# Supplementary material for: Phylogenetic Analysis and Codon Usage Bias Reveal the Base of Feline and Canine Chaphamaparvovirus for Cross-Species Transmission
Source: MDPI journal article supplement (doi:10.3390/ani13162617), 2023-08-14
Supplement: s1 [file s1]

## Supplementary Table 5

Detailed information of relative synonymous codon usage analysis (RSCU) of FeChPV and CaChPV with hosts.

| Codons |   | Virus               |                     |                     |                     | Host                |                     |
|--------|---|---------------------|---------------------|---------------------|---------------------|---------------------|---------------------|
|        |   | FeChPV              |                     | CaChPV              |                     | Canis               | Felis catus         |
|        |   | NS                  | VP                  | NS                  | VP                  |                     |                     |
| TTT    | F | <u>1.527</u>        | 0.911               | <b><u>1.740</u></b> | <b><u>1.953</u></b> | 0.961               | 0.921               |
| TTC    | F | 0.473               | <u>1.089</u>        | 0.260               | 0.047               | <u>1.039</u>        | <u>1.079</u>        |
| TTA    | L | <b><u>2.655</u></b> | <b><u>2.758</u></b> | <b><u>2.583</u></b> | <b><u>3.076</u></b> | 0.519               | 0.479               |
| TTG    | L | <u>1.556</u>        | 0.249               | <u>1.075</u>        | 0.245               | 0.804               | 0.787               |
| CTT    | L | 0.529               | 0.748               | <u>1.558</u>        | 0.971               | 0.827               | 0.784               |
| CTC    | L | 0.397               | 0.249               | 0.160               | 0.474               | <u>1.131</u>        | <u>1.172</u>        |
| CTA    | L | 0.712               | <u>1.247</u>        | 0.552               | <u>1.217</u>        | 0.457               | 0.418               |
| CTG    | L | 0.153               | 0.748               | 0.072               | 0.017               | <b><u>2.263</u></b> | <b><u>2.359</u></b> |
| ATT    | I | <u>1.597</u>        | 0.874               | <u>1.565</u>        | <b><u>1.729</u></b> | <u>1.100</u>        | <u>1.055</u>        |
| ATC    | I | 0.309               | 0.426               | 0.522               | 0.206               | <u>1.349</u>        | <u>1.422</u>        |
| ATA    | I | <u>1.094</u>        | <b><u>1.699</u></b> | 0.913               | <u>1.065</u>        | 0.551               | 0.523               |
| GTT    | V | <b><u>2.021</u></b> | 0.547               | <b><u>1.614</u></b> | <b><u>1.865</u></b> | 0.751               | 0.719               |
| GTC    | V | 0.598               | <u>1.096</u>        | 0.192               | 0.113               | 0.936               | 0.972               |
| GTA    | V | 0.801               | <b><u>2.291</u></b> | <b><u>1.644</u></b> | <b><u>1.838</u></b> | 0.514               | 0.471               |
| GTG    | V | 0.579               | 0.067               | 0.550               | 0.184               | <b><u>1.799</u></b> | <b><u>1.838</u></b> |
| TCT    | S | <u>1.479</u>        | 0.875               | <b><u>2.007</u></b> | <b><u>1.969</u></b> | <u>1.146</u>        | <u>1.088</u>        |

|     |   |                     |                     |                     |                     |              |                     |
|-----|---|---------------------|---------------------|---------------------|---------------------|--------------|---------------------|
| TCC | S | 0.664               | 0.013               | 0.825               | 0.415               | <u>1.249</u> | <u>1.312</u>        |
| TCA | S | <u>1.397</u>        | <b><u>2.676</u></b> | <u>1.216</u>        | <b><u>1.862</u></b> | 0.916        | 0.854               |
| TCG | S | 0.082               | 0.232               | 0.096               | 0.216               | 0.333        | 0.385               |
| AGT | S | 0.594               | <u>1.249</u>        | 0.645               | 0.574               | 0.953        | 0.906               |
| AGC | S | <b><u>1.783</u></b> | 0.954               | <u>1.211</u>        | 0.963               | <u>1.403</u> | <u>1.455</u>        |
| CCT | P | <u>1.365</u>        | 0.908               | <b><u>2.224</u></b> | <u>1.510</u>        | <u>1.147</u> | <u>1.091</u>        |
| CCC | P | 0.463               | 0.007               | 0.672               | 0.562               | <u>1.276</u> | <u>1.337</u>        |
| CCA | P | <b><u>1.971</u></b> | <b><u>2.991</u></b> | <u>1.103</u>        | <b><u>1.727</u></b> | <u>1.108</u> | <u>1.027</u>        |
| CCG | P | 0.201               | 0.093               | 0.000               | 0.201               | 0.468        | 0.546               |
| ACT | T | <b><u>1.758</u></b> | <u>1.260</u>        | <u>1.493</u>        | <u>1.301</u>        | <u>1.010</u> | 0.940               |
| ACC | T | 0.736               | 0.440               | 0.796               | 0.367               | <u>1.352</u> | <u>1.420</u>        |
| ACA | T | <u>1.236</u>        | <b><u>2.107</u></b> | <u>1.499</u>        | <b><u>1.958</u></b> | <u>1.164</u> | <u>1.072</u>        |
| ACG | T | 0.269               | 0.193               | 0.212               | 0.374               | 0.474        | 0.569               |
| GCT | A | <b><u>2.286</u></b> | <u>1.334</u>        | <b><u>1.608</u></b> | <b><u>1.547</u></b> | <u>1.066</u> | 0.993               |
| GCC | A | 0.582               | 0.000               | 0.471               | 0.143               | <u>1.581</u> | <b><u>1.655</u></b> |
| GCA | A | <u>1.132</u>        | <b><u>2.515</u></b> | <b><u>1.626</u></b> | <b><u>2.276</u></b> | 0.933        | 0.859               |
| GCG | A | 0.000               | 0.151               | 0.295               | 0.035               | 0.421        | 0.493               |
| TAT | Y | <b><u>1.720</u></b> | <u>1.451</u>        | <b><u>1.874</u></b> | <u>1.281</u>        | 0.920        | 0.865               |
| TAC | Y | 0.280               | 0.549               | 0.126               | 0.719               | <u>1.080</u> | <u>1.135</u>        |
| CAT | H | <u>1.270</u>        | <u>1.595</u>        | <u>1.540</u>        | <b><u>1.679</u></b> | 0.861        | 0.792               |
| CAC | H | 0.730               | 0.405               | 0.460               | 0.321               | <u>1.139</u> | <u>1.208</u>        |
| CAA | Q | <u>1.483</u>        | <b><u>1.680</u></b> | <u>1.562</u>        | <b><u>1.723</u></b> | 0.542        | 0.510               |
| CAG | Q | 0.517               | 0.320               | 0.438               | 0.277               | <u>1.458</u> | <u>1.490</u>        |
| AAT | N | <u>1.345</u>        | <u>1.585</u>        | <u>1.134</u>        | <u>1.542</u>        | 0.978        | 0.912               |
| AAC | N | 0.655               | 0.415               | 0.866               | 0.458               | <u>1.022</u> | <u>1.088</u>        |
| AAA | K | <b><u>1.600</u></b> | <b><u>1.986</u></b> | <b><u>1.917</u></b> | <b><u>1.871</u></b> | 0.898        | 0.872               |

|     |   |                     |                     |                     |                     |              |              |
|-----|---|---------------------|---------------------|---------------------|---------------------|--------------|--------------|
| AAG | K | 0.400               | 0.014               | 0.083               | 0.129               | <u>1.102</u> | <u>1.128</u> |
| GAT | D | <u>1.573</u>        | <u>1.281</u>        | <b><u>1.637</u></b> | <u>1.490</u>        | 0.966        | 0.899        |
| GAC | D | 0.427               | 0.719               | 0.363               | 0.510               | <u>1.034</u> | <u>1.101</u> |
| GAA | E | <b><u>1.749</u></b> | <b><u>1.895</u></b> | <b><u>1.639</u></b> | <b><u>1.994</u></b> | 0.886        | 0.850        |
| GAG | E | 0.251               | 0.105               | 0.361               | 0.006               | <u>1.114</u> | <u>1.150</u> |
| TGT | C | <u>1.000</u>        | 0.875               | <u>1.084</u>        | <b><u>1.721</u></b> | 0.957        | 0.933        |
| TGC | C | <u>1.000</u>        | <u>1.125</u>        | 0.916               | 0.279               | <u>1.043</u> | <u>1.067</u> |
| CGT | R | 0.435               | 0.364               | 0.927               | 0.938               | 0.466        | 0.463        |
| CGC | R | 0.435               | 0.000               | 0.595               | 0.560               | <u>1.003</u> | <u>1.056</u> |
| CGA | R | 0.590               | 0.000               | <u>1.288</u>        | <u>1.420</u>        | 0.673        | 0.659        |
| CGG | R | 0.156               | 0.000               | 0.156               | 0.059               | <u>1.217</u> | <u>1.285</u> |
| AGA | R | <b><u>3.948</u></b> | <b><u>5.553</u></b> | <b><u>2.255</u></b> | <b><u>2.605</u></b> | <u>1.351</u> | <u>1.260</u> |
| AGG | R | 0.435               | 0.083               | 0.780               | 0.419               | <u>1.291</u> | <u>1.277</u> |
| GGT | G | 0.738               | 0.582               | 0.657               | 1.038               | 0.653        | 0.631        |
| GGC | G | 0.485               | 0.143               | 0.746               | 0.443               | <u>1.319</u> | <u>1.358</u> |
| GGA | G | <b><u>2.008</u></b> | <b><u>2.980</u></b> | <b><u>2.117</u></b> | <b><u>2.485</u></b> | <u>1.026</u> | 0.992        |
| GGG | G | 0.768               | 0.295               | 0.480               | 0.033               | <u>1.002</u> | <u>1.019</u> |

Note:RSCU > 1.6 are underlined and **bolded**; 1<rscu<1.6 are underlined.
