# Supplementary material for: Phylogenetic Analysis and Codon Usage Bias Reveal the Base of Feline and Canine Chaphamaparvovirus for Cross-Species Transmission
Source: MDPI journal article supplement (doi:10.3390/ani13162617), 2023-08-14
Supplement: s1 [file s1]

|            | 250      | 260       | 270       | 280           | 290          | 300          |
|------------|----------|-----------|-----------|---------------|--------------|--------------|
| F/CAT/MN39 | TWSWNAHP | TDDNKWFNF | DQIAKWAPY | MHDHPFLRFNM   | GGPKGAYTVWGH | DDPYKLOTRAN  |
| F/CAT/MN79 | TWSWNAHP | TDDNKWFNF | DQIAKWAPY | MHDHPFLRFNM   | GGPKGAYTVWGH | DDPYKLOTRAN  |
| F/CAT/MW40 | TWSWNAHP | TDDNKWFNF | DQIAKWAPY | MHDHPFLRFNM   | GGPKGAYTVWGH | DDPYKLOTRAN  |
| F/CAT/MW40 | TWSWNAHP | TDDNKWFNF | DQIAKWAPY | MHDHPFLRFNM   | GGPKGAYTVWGH | DDPYKLOTRAN  |
| F/CAT/MW40 | TWSWNAHP | TDDNKWFNF | DQIAKWAPY | MHDHPFLRFNM   | GGPKGAYTVWGH | DDPYKLOTRAN  |
| F/CAT/MT70 | TWSWNAHP | TDDNKWFNF | DQIAKWAPY | MHDHPFLRFNM   | GGPKGAYTVWGH | DDPYKLOTRAN  |
| F/CAT/MT70 | TWSWNAHP | TDDNKWFNF | DQIAKWAPY | MHDHPFLRFNM   | GGPKGAYTVWGH | DDPYKLOTRAN  |
| F/CAT/MZ03 | TWSWNAHP | TDDNKWFNF | DQIAKWAPY | MHDHPFLRFNM   | GGPKGAYTVWGH | DDPYKLOTRAN  |
| F/CAT/MZ03 | TWSWNAHP | TDDNKWFNF | DQIAKWAPY | MHDHPFLRFNM   | GGPKGAYTVWGH | DDPYKLOTRAN  |
| F/CAT/OP49 | TWSWNAHP | TDDNKWFNF | DQIAKWAPY | MHDHPFLRFNM   | GGPKGAYTVWGH | DDPYKLOTRAN  |
| F/CAT/OP49 | TWSWNAHP | TDDNKWFNF | DQIAKWAPY | MHDHPFLRFNM   | GGPKGAYTVWGH | DDPYKLOTRAN  |
| F/CAT/OP49 | TWSWNAHP | TDDNKWFNF | DQIAKWAPY | MHDHPFLRFNM   | GGPKGAYTVWGH | DDPYKLOTRAN  |
| F/CAT/MW40 | TWSWNAHP | TDDNKWFNF | DQIAKWAPY | MHDHPFLRFNM   | GGPKGAYTVWGH | DDPYKLOTRAN  |
| F/CAT/MW40 | TWSWNAHP | TDDNKWFNF | DQIAKWAPY | MHDHPFLRFNM   | GGPKGAYTVWGH | DDPYKLOTRAN  |
| F/CAT/MZ71 | TWSWNAHP | TDDNKWFNF | HQIAKWAPY | MHDHPFLRFNM   | GGGKGAYTVWGH | DDPYKLOTRAN  |
| F/DOG/OQ16 | TWSWNAHP | TDDNKWFNF | DQIAKWAPY | MHDHPFLRFNM   | GGPKGAYTVWGH | DDPYKLOTRAN  |
| F/DOG/OQ16 | TWSWNAHP | TDDNKWFNF | DQIAKWAPY | MHDHPFLRFNM   | GGPKGAYTVWGH | DDPYKLOTRAN  |
| C/CAT/MN92 | TWSWNVHP | ADENRWNFN | DQIAKWAPY | VHDNPFLKYNMAG | GTGSYIVAP    | QDDPYKLOTRAN |
| C/CAT/MN92 | TWSWNVHP | ADENRWNFN | DQIAKWAPY | VHDNPFLKYNMAG | GTGSYIVAP    | QDDPYKLOTRAN |
| C/DOG/MK44 | TWSWNVHP | ADENRWNFN | DQIAKWAPY | VHDNPFLKYNMAG | GTGSYIVAP    | QDDPYKLOTRAN |
| C/DOG/MT12 | TWSWNVHP | ADENRWNFN | DQIAKWAPY | VHDNPFLKYNMAG | GTGSYIVAP    | QDDPYKLOTRAN |
| C/DOG/MT12 | TWSWNVHP | ADENRWNFN | DQIAKWAPY | VHDNPFLKYNMAG | GTGSYIVAP    | QDDPYKLOTRAN |
| C/DOG/MT12 | TWSWNVHP | ADENRWNFN | DQIAKWAPY | VHDNPFLKYNMAG | GTGSYIVAP    | QDDPYKLOTRAN |
| C/DOG/MT12 | TWSWNVHP | ADENRWNFN | DQIAKWAPY | VHDNPFLKYNMAG | GTGSYIVAP    | QDDPYKLOTRAN |
| C/DOG/MT71 | TWSWNVHP | ADENRWNFN | DQIAKWAPY | VHDNPFLKYNMAG | GTGSYIVAP    | QDDPYKLOTRAN |
| C/DOG/MT71 | TWSWNVHP | ADENRWNFN | DQIAKWAPY | VHDNPFLKYNMAG | GTGSYIVAP    | QDDPYKLOTRAN |
| C/DOG/OK54 | TWSWNVHP | ADENRWNFN | DQIAKWAPY | VHDNPFLKYNMAG | GTGSYIVAP    | QDDPYKLOTRAN |
| C/DOG/OK54 | TWSWNVHP | ADENRWNFN | DQIAKWAPY | VHDNPFLKYNMAG | GTGSYIVAP    | QDDPYKLOTRAN |
| C/DOG/OK54 | TWSWNVHP | ADENRWNFN | DQIAKWAPY | VHDNPFLKYNMAG | GTGSYIVAP    | QDDPYKLOTRAN |
| C/DOG/OM64 | TWSWNVHP | ADENRWNFN | DQIAKWAPY | VHDNPFLKYNMAG | GTGSYIVAP    | QDDPYKLOTRAN |
| C/DOG/OM64 | TWSWNVHP | ADENRWNFN | DQIAKWAPY | VHDNPFLKYNMAG | GTGSYIVAP    | QDDPYKLOTRAN |

|            |   | 310 | 320 | 330 | 340 | 350 |
|------------|---|-----|-----|-----|-----|-----|
| F/CAT/MN39 | T | N   | V   | N   | .   | .   |
| F/CAT/MN79 | T | N   | V   | N   | .   | .   |
| F/CAT/MW40 | T | N   | V   | N   | .   | .   |
| F/CAT/MW40 | T | N   | V   | N   | .   | .   |
| F/CAT/MT70 | T | N   | V   | N   | .   | .   |
| F/CAT/MT70 | T | N   | V   | N   | .   | .   |
| F/CAT/MZ03 | T | N   | V   | N   | .   | .   |
| F/CAT/MZ03 | T | N   | V   | N   | .   | .   |
| F/CAT/OP49 | T | N   | V   | N   | .   | .   |
| F/CAT/OP49 | T | N   | V   | N   | .   | .   |
| F/CAT/OP49 | T | N   | V   | N   | .   | .   |
| F/CAT/OP49 | T | N   | V   | N   | .   | .   |
| F/CAT/MW40 | T | N   | V   | N   | .   | .   |
| F/CAT/MW40 | T | N   | V   | N   | .   | .   |
| F/CAT/MZ71 | T | N   | V   | N   | .   | .   |
| F/DOG/QQ16 | T | N   | V   | N   | .   | .   |
| F/DOG/QQ16 | T | N   | V   | N   | .   | .   |
| C/CAT/MN92 | C | N   | S   | D   | L   | A   |
| C/CAT/MN92 | C | N   | S   | D   | L   | A   |
| C/DOG/MK44 | C | N   | S   | D   | L   | A   |
| C/DOG/MT12 | C | N   | S   | D   | L   | A   |
| C/DOG/MT12 | C | N   | S   | D   | L   | A   |
| C/DOG/MT12 | C | N   | S   | D   | L   | A   |
| C/DOG/MT12 | C | N   | S   | D   | L   | A   |
| C/DOG/MT71 | C | N   | S   | D   | L   | A   |
| C/DOG/MT71 | C | N   | S   | D   | L   | A   |
| C/DOG/OK54 | C | N   | S   | D   | L   | A   |
| C/DOG/OK54 | C | N   | S   | D   | L   | A   |
| C/DOG/OK54 | C | N   | S   | D   | L   | A   |
| C/DOG/OM64 | C | N   | S   | D   | L   | A   |
| C/DOG/OM64 | C | N   | S   | D   | L   | A   |



|            | 480 | 490 | 500 |   |   |   |   |   |   |   |   |   |   |   |   |   |   |   |   |   |   |   |   |   |   |   |   |   |   |   |   |   |   |   |   |   |   |   |   |   |   |   |   |
|------------|-----|-----|-----|---|---|---|---|---|---|---|---|---|---|---|---|---|---|---|---|---|---|---|---|---|---|---|---|---|---|---|---|---|---|---|---|---|---|---|---|---|---|---|---|
| F/CAT/MN39 | D   | L   | I   | D | L | I | K | K | T | K | E | T | K | T | N | D | . | . | . | . | . | . | D | E | N | D | N | F | E | M | I | E | E | D | D | . | . | . | . | . | K |   |   |
| F/CAT/MN79 | D   | L   | I   | D | L | I | K | K | T | K | E | T | K | T | D | . | . | . | . | . | . | . | D | E | N | D | N | F | E | M | N | E | E | D | D | . | . | . | . | . | K |   |   |
| F/CAT/MW40 | D   | L   | I   | D | L | I | K | K | T | K | E | T | K | T | N | D | . | . | . | . | . | . | D | E | N | D | N | F | E | M | I | E | E | D | D | . | . | . | . | . | K |   |   |
| F/CAT/MW40 | D   | L   | I   | D | L | I | K | K | T | K | E | T | K | T | N | D | . | . | . | . | . | . | E | K | N | D | H | F | E | M | I | E | E | D | D | . | . | . | . | . | K |   |   |
| F/CAT/MT70 | D   | L   | I   | D | L | I | K | K | T | K | E | T | K | T | N | D | . | . | . | . | . | . | D | E | N | D | N | F | E | M | I | E | E | D | D | . | . | . | . | . | K |   |   |
| F/CAT/MT70 | D   | L   | I   | D | L | I | K | K | T | K | E | T | K | T | N | D | . | . | . | . | . | . | D | E | N | D | N | F | E | M | I | E | E | D | D | . | . | . | . | . | K |   |   |
| F/CAT/MZ03 | D   | L   | I   | D | L | I | K | K | T | K | E | T | K | T | N | D | . | . | . | . | . | . | D | E | N | D | N | F | E | M | I | E | E | D | D | . | . | . | . | . | K |   |   |
| F/CAT/MZ03 | D   | L   | I   | D | L | I | K | K | T | K | E | T | K | T | N | D | . | . | . | . | . | . | D | E | N | D | N | F | E | M | I | E | E | D | D | . | . | . | . | . | K |   |   |
| F/CAT/OP49 | D   | L   | I   | D | L | I | K | K | T | K | E | T | K | T | N | D | . | . | . | . | . | . | D | E | N | D | N | F | E | M | I | E | E | D | D | . | . | . | . | . | K |   |   |
| F/CAT/OP49 | D   | L   | I   | D | L | I | K | K | T | K | E | T | K | T | N | D | . | . | . | . | . | . | D | E | N | D | N | F | E | M | I | E | E | D | D | . | . | . | . | . | K |   |   |
| F/CAT/OP49 | D   | L   | I   | D | L | I | K | K | T | K | E | T | K | T | N | D | . | . | . | . | . | . | D | E | N | D | N | F | E | M | I | E | E | D | D | . | . | . | . | . | K |   |   |
| F/CAT/MW40 | D   | L   | I   | D | L | I | K | K | T | K | E | T | K | T | N | D | . | . | . | . | . | . | D | E | N | D | N | F | E | M | I | E | E | D | D | . | . | . | . | . | K |   |   |
| F/CAT/MW40 | D   | L   | I   | D | L | I | K | K | T | K | E | T | K | T | N | D | . | . | . | . | . | . | D | E | N | D | N | F | E | M | I | E | E | D | D | . | . | . | . | . | K |   |   |
| F/CAT/MZ71 | D   | L   | I   | D | L | I | K | K | T | K | E | T | K | T | N | D | . | . | . | . | . | . | D | E | N | D | N | F | E | M | I | E | E | D | D | . | . | . | . | . | K |   |   |
| F/DOG/OQ16 | D   | L   | I   | D | L | I | K | K | T | K | E | T | K | T | N | D | . | . | . | . | . | . | D | E | N | D | N | F | E | M | I | E | E | D | E | . | . | . | . | . | K |   |   |
| F/DOG/OQ16 | D   | L   | I   | D | L | I | K | K | T | K | E | T | K | T | N | D | . | . | . | . | . | . | D | E | N | D | N | F | E | M | I | E | E | D | D | . | . | . | . | . | K |   |   |
| C/CAT/MN92 | E   | L   | V   | N | L | I | K | R | H | K | K | T | K | E | P | E | M | I | E | M | Q | E | L | H | H | T | D | E | E | I | E | V | I | T | A | D | E | A | T | E | L | M | E |
| C/CAT/MN92 | E   | L   | V   | N | L | I | K | R | H | K | K | T | K | E | P | E | M | I | E | M | Q | E | L | P | H | T | D | E | E | I | E | V | I | T | A | D | E | A | T | E | L | M | E |
| C/DOG/MK44 | E   | L   | V   | N | L | I | K | R | H | K | K | T | K | E | P | E | M | I | E | M | Q | E | L | H | H | T | D | E | E | I | E | V | I | T | A | D | E | A | T | E | L | M | E |
| C/DOG/MT12 | E   | L   | V   | N | L | I | K | R | H | K | K | T | K | E | P | E | M | I | E | M | Q | E | L | H | H | T | D | E | E | I | E | V | I | T | A | D | E | A | T | E | L | M | E |
| C/DOG/MT12 | E   | L   | V   | N | L | I | K | R | H | K | K | T | K | E | P | E | M | I | E | M | Q | E | L | H | H | T | D | E | E | I | E | V | I | T | A | D | E | A | T | E | L | M | E |
| C/DOG/MT12 | E   | L   | V   | N | L | I | K | R | H | K | K | T | K | E | P | E | M | I | E | L | Q | E | L | H | H | T | D | E | E | I | E | V | I | T | A | D | E | A | T | E | L | M | E |
| C/DOG/MT12 | E   | L   | V   | N | L | I | K | R | H | K | K | T | K | E | P | E | M | I | E | M | Q | E | L | H | H | T | D | E | E | I | E | V | I | T | A | D | E | A | T | E | L | M | E |
| C/DOG/MT71 | E   | L   | V   | N | L | I | K | R | H | K | K | T | K | E | P | E | M | I | E | M | Q | E | L | H | H | T | D | E | E | I | E | V | I | T | A | D | E | A | T | E | L | M | E |
| C/DOG/MT71 | E   | L   | V   | N | L | I | K | R | H | K | K | T | K | E | P | E | M | I | E | M | Q | E | L | H | H | T | D | E | E | I | E | V | I | T | A | D | E | A | T | E | L | M | E |
| C/DOG/OK54 | E   | L   | V   | N | L | I | K | R | H | K | K | T | K | E | P | E | M | I | E | M | Q | E | L | H | H | T | D | E | E | I | E | V | I | T | A | D | E | A | T | E | L | I | E |
| C/DOG/OK54 | E   | L   | V   | N | L | I | K | R | H | K | K | T | K | E | P | E | M | I | E | M | Q | E | L | N | H | T | D | E | E | I | E | L | I | S | A | D | E | A | T | E | A | M | E |
| C/DOG/OM64 | E   | L   | V   | N | L | I | K | R | H | K | K | T | K | E | P | E | M | I | E | M | Q | E | L | H | H | T | D | E | E | I | E | V | I | T | A | D | E | A | T | E | L | M | E |
| C/DOG/OM64 | E   | L   | V   | N | L | I | K | R | H | K | K | T | K | E | P | E | M | I | E | M | Q | E | L | H | H | T | D | E | E | I | E | L | I | S | A | D | E | A | T | E | A | M | G |
