# Supplementary material for: Phylogenetic Analysis and Codon Usage Bias Reveal the Base of Feline and Canine Chaphamaparvovirus for Cross-Species Transmission
Source: MDPI journal article supplement (doi:10.3390/ani13162617), 2023-08-14
Supplement: s1 [file s1]

| Percent Identity |      |      |      |      |      |      |      |      |      |      |      |      |      |      |      |      |      |      |      |      |      |       |      |      |      |      |      |      |      |      |      |                                         |                                         |
|------------------|------|------|------|------|------|------|------|------|------|------|------|------|------|------|------|------|------|------|------|------|------|-------|------|------|------|------|------|------|------|------|------|-----------------------------------------|-----------------------------------------|
|                  | 1    | 2    | 3    | 4    | 5    | 6    | 7    | 8    | 9    | 10   | 11   | 12   | 13   | 14   | 15   | 16   | 17   | 18   | 19   | 20   | 21   | 22    | 23   | 24   | 25   | 26   | 27   | 28   | 29   | 30   |      |                                         |                                         |
| 1                |      | 99.8 | 98.8 | 98.6 | 98.9 | 98.8 | 98.9 | 99.4 | 99.3 | 98.7 | 98.9 | 99.1 | 99.3 | 94.0 | 98.9 | 94.3 | 73.3 | 73.1 | 74.0 | 74.0 | 74.0 | 74.1  | 71.0 | 70.9 | 70.7 | 71.1 | 74.2 | 74.1 | 74.1 | 73.7 | 1    | MH893826.1-Cachavirus-Canine-2017-USA   |                                         |
| 2                | 0.2  |      | 98.6 | 98.6 | 99.0 | 98.7 | 98.9 | 99.2 | 99.2 | 98.8 | 98.9 | 99.1 | 99.4 | 94.0 | 98.9 | 94.2 | 73.3 | 73.0 | 73.9 | 73.9 | 73.9 | 74.0  | 70.3 | 70.2 | 69.3 | 70.0 | 74.1 | 74.0 | 74.0 | 73.6 | 2    | MK448316.1-Cachavirus-Canine-2018-USA   |                                         |
| 3                | 1.3  | 1.3  |      | 98.8 | 98.4 | 98.7 | 98.7 | 99.0 | 99.0 | 98.7 | 98.6 | 98.8 | 99.0 | 93.4 | 98.5 | 93.5 | 73.5 | 73.4 | 73.5 | 73.5 | 73.5 | 73.6  | 72.5 | 72.6 | 72.4 | 72.7 | 73.7 | 73.6 | 73.6 | 73.2 | 3    | MT123283.1-Chapparvovirus-Canine-2018-C |                                         |
| 4                | 1.4  | 1.3  | 1.2  |      | 98.6 | 98.7 | 99.0 | 98.5 | 98.5 | 98.9 | 99.1 | 98.7 | 99.0 | 93.4 | 98.6 | 93.3 | 73.6 | 73.5 | 73.6 | 73.6 | 73.6 | 73.6  | 72.6 | 72.7 | 72.5 | 72.8 | 73.8 | 73.6 | 73.7 | 73.3 | 4    | MT123284.1-Chapparvovirus-Canine-2019-C |                                         |
| 5                | 1.1  | 0.9  | 1.6  | 1.4  |      | 98.8 | 98.9 | 98.8 | 98.8 | 98.8 | 98.8 | 98.9 | 99.1 | 93.4 | 98.8 | 93.5 | 73.7 | 73.6 | 73.7 | 73.6 | 73.6 | 73.7  | 72.7 | 72.7 | 72.5 | 72.8 | 73.9 | 73.7 | 73.8 | 73.4 | 5    | MT123285.1-Chapparvovirus-Canine-2019-C |                                         |
| 6                | 1.2  | 1.3  | 1.3  | 1.4  | 1.2  |      | 99.0 | 98.7 | 98.7 | 98.8 | 98.9 | 98.8 | 99.0 | 93.5 | 98.6 | 93.4 | 73.7 | 73.6 | 73.7 | 73.7 | 73.7 | 73.8  | 72.7 | 72.8 | 72.6 | 72.9 | 73.9 | 73.8 | 73.8 | 73.4 | 6    | MT123286.1-Chapparvovirus-Canine-2019-C |                                         |
| 7                | 1.1  | 1.1  | 1.3  | 1.1  | 1.1  | 1.0  |      | 98.7 | 98.7 | 99.1 | 99.2 | 98.9 | 99.1 | 93.5 | 98.7 | 93.4 | 73.6 | 73.5 | 73.6 | 73.6 | 73.6 | 73.6  | 72.6 | 72.7 | 72.5 | 72.8 | 73.9 | 73.6 | 73.7 | 73.3 | 7    | MT123287.1-Chapparvovirus-Canine-2019-C |                                         |
| 8                | 0.6  | 0.7  | 1.0  | 1.5  | 1.2  | 1.3  | 1.3  |      | 99.9 | 98.8 | 98.7 | 99.2 | 99.3 | 94.2 | 98.9 | 94.3 | 73.2 | 73.1 | 74.0 | 74.0 | 74.0 | 74.0  | 72.1 | 72.1 | 71.9 | 72.2 | 74.2 | 74.0 | 74.0 | 73.7 | 8    | MT710947.1-Carnivore_chaphamaparvovirus |                                         |
| 9                | 0.7  | 0.7  | 1.1  | 1.5  | 1.2  | 1.3  | 1.3  | 0.1  |      | 98.8 | 98.6 | 99.2 | 99.3 | 94.2 | 98.9 | 94.4 | 73.2 | 73.1 | 73.9 | 73.9 | 73.9 | 74.0  | 72.0 | 72.0 | 71.8 | 72.2 | 74.1 | 74.0 | 74.0 | 73.6 | 9    | MT710948.1-Carnivore_chaphamaparvovirus |                                         |
| 10               | 1.3  | 1.2  | 1.3  | 1.1  | 1.2  | 1.2  | 0.9  | 1.2  | 1.2  |      | 99.1 | 99.0 | 99.2 | 93.6 | 98.8 | 93.5 | 73.7 | 73.6 | 73.7 | 73.7 | 73.7 | 73.8  | 72.8 | 72.8 | 72.6 | 72.9 | 74.0 | 73.8 | 73.8 | 73.4 | 10   | MN928790.1-Chapparvovirus_sp-Feline-201 |                                         |
| 11               | 1.1  | 1.1  | 1.4  | 0.9  | 1.2  | 1.1  | 0.8  | 1.4  | 1.4  | 0.9  |      | 98.8 | 99.1 | 93.5 | 98.7 | 93.4 | 73.7 | 73.6 | 73.7 | 73.7 | 73.7 | 73.8  | 72.7 | 72.7 | 72.6 | 72.9 | 73.9 | 73.7 | 73.8 | 73.4 | 11   | MN928791.1-Chapparvovirus_sp-Feline-201 |                                         |
| 12               | 0.9  | 0.8  | 1.1  | 1.3  | 1.1  | 1.2  | 1.1  | 0.8  | 0.8  | 1.0  | 1.1  |      | 99.6 | 94.0 | 99.0 | 94.2 | 73.2 | 73.0 | 73.9 | 73.9 | 73.9 | 74.0  | 71.2 | 71.2 | 71.0 | 71.4 | 74.1 | 74.0 | 74.0 | 73.6 | 12   | OK546100.1-Carnivore_chaphamaparvovirus |                                         |
| 13               | 0.7  | 0.6  | 1.0  | 1.0  | 0.9  | 1.0  | 0.9  | 0.7  | 0.7  | 0.8  | 0.9  | 0.4  |      | 94.0 | 99.3 | 94.2 | 73.3 | 73.1 | 74.0 | 74.0 | 74.0 | 74.0  | 71.2 | 71.2 | 71.1 | 71.4 | 74.2 | 74.0 | 74.1 | 73.7 | 13   | OK546101.1-Carnivore_chaphamaparvovirus |                                         |
| 14               | 6.2  | 6.2  | 6.9  | 7.0  | 6.9  | 6.8  | 6.9  | 6.1  | 6.0  | 6.7  | 6.9  | 6.2  | 6.2  |      | 94.0 | 97.8 | 73.0 | 72.7 | 73.5 | 73.5 | 73.5 | 73.6  | 72.3 | 72.4 | 72.5 | 72.6 | 73.7 | 73.6 | 73.8 | 73.3 | 14   | OK546102.1-Carnivore_chaphamaparvovirus |                                         |
| 15               | 1.0  | 0.9  | 1.3  | 1.3  | 1.1  | 1.3  | 1.2  | 1.0  | 1.0  | 1.1  | 1.2  | 0.8  | 0.5  | 6.2  |      | 94.0 | 73.1 | 72.9 | 73.7 | 73.7 | 73.7 | 73.7  | 73.7 | 72.2 | 72.2 | 72.0 | 72.4 | 73.9 | 73.7 | 73.8 | 73.4 | 15                                      | OM640108.1-Carnivore_chaphamaparvovirus |
| 16               | 6.0  | 6.0  | 6.9  | 7.1  | 6.8  | 6.9  | 7.0  | 5.9  | 5.9  | 6.8  | 6.9  | 6.1  | 6.0  | 2.2  | 6.1  |      | 73.2 | 72.9 | 73.8 | 73.8 | 73.8 | 73.8  | 71.2 | 71.3 | 71.4 | 71.5 | 73.8 | 73.8 | 73.9 | 73.5 | 16   | OM640109.1-Carnivore_chaphamaparvovirus |                                         |
| 17               | 33.0 | 33.0 | 32.7 | 32.6 | 32.4 | 32.4 | 32.6 | 33.2 | 33.2 | 32.4 | 32.4 | 33.1 | 33.0 | 33.5 | 33.2 | 33.3 |      | 98.6 | 99.3 | 99.3 | 99.3 | 99.3  | 99.3 | 98.6 | 98.7 | 98.5 | 98.5 | 98.7 | 98.8 | 99.2 | 98.2 | 17                                      | MZ031965.1-Feline_chaphamaparvovirus-Fe |
| 18               | 33.4 | 33.4 | 32.8 | 32.7 | 32.6 | 32.6 | 32.7 | 33.3 | 33.4 | 32.5 | 32.6 | 33.4 | 33.3 | 33.9 | 33.5 | 33.7 | 1.4  |      | 98.5 | 98.5 | 98.4 | 98.5  | 98.1 | 98.9 | 99.3 | 99.4 | 99.4 | 98.9 | 98.7 | 99.4 | 18   | MZ031966.1-Feline_chaphamaparvovirus-Fe |                                         |
| 19               | 31.9 | 32.0 | 32.7 | 32.5 | 32.4 | 32.4 | 32.5 | 32.0 | 32.0 | 32.4 | 32.4 | 32.0 | 31.9 | 32.6 | 32.2 | 32.3 | 0.7  | 1.5  |      | 99.9 | 99.9 | 100.0 | 98.8 | 98.8 | 98.6 | 98.4 | 98.5 | 98.6 | 99.2 | 98.0 | 19   | OP499830.1-Feline_chaphamaparvovirus-Fe |                                         |
| 20               | 31.9 | 32.0 | 32.7 | 32.6 | 32.5 | 32.4 | 32.6 | 32.0 | 32.1 | 32.4 | 32.4 | 32.1 | 32.0 | 32.7 | 32.3 | 32.3 | 0.7  | 1.6  | 0.1  |      | 99.9 | 99.9  | 98.7 | 98.8 | 98.5 | 98.3 | 98.4 | 98.5 | 99.3 | 97.9 | 20   | OP499831.1-Feline_chaphamaparvovirus-Fe |                                         |
| 21               | 31.9 | 32.0 | 32.7 | 32.6 | 32.5 | 32.4 | 32.6 | 32.0 | 32.1 | 32.4 | 32.4 | 32.1 | 32.0 | 32.7 | 32.3 | 32.3 | 0.7  | 1.6  | 0.1  | 0.1  |      | 99.9  | 98.7 | 98.7 | 98.5 | 98.3 | 98.3 | 98.5 | 99.2 | 97.9 | 21   | OP499832.1-Feline_chaphamaparvovirus-Fe |                                         |
| 22               | 31.9 | 31.9 | 32.6 | 32.5 | 32.4 | 32.3 | 32.5 | 31.9 | 32.0 | 32.3 | 32.3 | 32.0 | 31.9 | 32.6 | 32.2 | 32.2 | 0.7  | 1.5  | 0.0  | 0.1  | 0.1  |       | 98.8 | 98.8 | 98.5 | 98.4 | 98.4 | 98.6 | 99.3 | 97.9 | 22   | OP499833.1-Feline_chaphamaparvovirus-Fe |                                         |
| 23               | 36.7 | 37.8 | 34.3 | 34.1 | 34.0 | 34.0 | 34.1 | 35.0 | 35.1 | 33.8 | 34.0 | 36.4 | 36.3 | 34.6 | 34.6 | 36.3 | 1.4  | 1.9  | 1.2  | 1.3  | 1.4  | 1.3   |      | 99.0 | 98.1 | 98.0 | 98.2 | 98.1 | 98.5 | 97.7 | 23   | OQ162042.1-Feline_chaphamaparvovirus-Ca |                                         |
| 24               | 36.9 | 38.0 | 34.2 | 34.0 | 33.9 | 33.9 | 34.0 | 35.0 | 35.1 | 33.8 | 33.9 | 36.4 | 36.3 | 34.5 | 34.6 | 36.3 | 1.3  | 1.1  | 1.2  | 1.3  | 1.3  | 1.2   | 1.0  |      | 99.1 | 98.9 | 99.0 | 98.6 | 98.5 | 98.4 | 24   | OQ162043.1-Feline_chaphamaparvovirus-Ca |                                         |
| 25               | 37.1 | 39.4 | 34.4 | 34.2 | 34.2 | 34.1 | 34.2 | 35.2 | 35.3 | 34.2 | 34.1 | 36.6 | 36.5 | 34.2 | 34.9 | 35.9 | 1.4  | 0.7  | 1.4  | 1.5  | 1.5  | 1.4   | 1.9  | 0.9  |      | 98.5 | 99.4 | 98.8 | 98.5 | 98.8 | 25   | MN396757.1-Feline_chaphamaparvovirus-Fe |                                         |
| 26               | 36.6 | 38.3 | 34.0 | 33.8 | 33.7 | 33.7 | 33.8 | 34.7 | 34.8 | 33.6 | 33.7 | 36.1 | 36.0 | 34.1 | 34.3 | 35.9 | 1.6  | 0.6  | 1.6  | 1.7  | 1.7  | 1.6   | 2.0  | 1.2  | 1.5  |      | 99.2 | 98.7 | 98.5 | 99.0 | 26   | MN794869.1-Carnivore_chapparvovirus_1-F |                                         |
| 27               | 31.7 | 31.7 | 32.4 | 32.2 | 32.1 | 32.0 | 32.1 | 31.6 | 31.7 | 32.0 | 32.1 | 31.7 | 31.6 | 32.4 | 31.9 | 32.2 | 1.3  | 0.6  | 1.6  | 1.6  | 1.7  | 1.6   | 1.9  | 1.0  | 0.6  | 0.8  |      | 98.8 | 98.3 | 98.8 | 27   | MW404252.1-Feline_chaphamaparvovirus-Fe |                                         |
| 28               | 31.9 | 31.9 | 32.6 | 32.5 | 32.4 | 32.3 | 32.5 | 31.9 | 32.0 | 32.3 | 32.4 | 32.0 | 31.9 | 32.5 | 32.2 | 32.3 | 1.2  | 1.1  | 1.4  | 1.5  | 1.5  | 1.4   | 2.0  | 1.4  | 1.1  | 1.3  | 1.2  |      | 98.5 | 98.3 | 28   | MW404253.1-Feline_chaphamaparvovirus-Fe |                                         |
| 29               | 31.8 | 31.8 | 32.5 | 32.4 | 32.3 | 32.2 | 32.4 | 31.9 | 31.9 | 32.2 | 32.2 | 31.9 | 31.8 | 32.3 | 32.1 | 32.1 | 0.8  | 1.4  | 0.8  | 0.7  | 0.8  | 0.7   | 1.5  | 1.5  | 1.5  | 1.6  | 1.7  | 1.5  |      | 98.1 | 29   | MT708230.1-Feline_chaphamaparvovirus-Fe |                                         |
| 30               | 32.4 | 32.5 | 33.1 | 33.0 | 32.9 | 32.8 | 33.0 | 32.4 | 32.5 | 32.8 | 32.9 | 32.5 | 32.4 | 33.0 | 32.6 | 32.8 | 1.9  | 0.6  | 2.1  | 2.2  | 2.2  | 2.1   | 2.4  | 1.6  | 1.2  | 1.0  | 1.2  | 1.7  | 1.9  |      | 30   | MT708231.1-Feline_chaphamaparvovirus-Fe |                                         |
|                  | 1    | 2    | 3    | 4    | 5    | 6    | 7    | 8    | 9    | 10   | 11   | 12   | 13   | 14   | 15   | 16   | 17   | 18   | 19   | 20   | 21   | 22    | 23   | 24   | 25   | 26   | 27   | 28   | 29   | 30   |      |                                         |                                         |



| Percent Identity |    |      |      |      |      |      |      |      |      |      |      |      |      |      |      |      |      |      |      |      |      |      |      |      |      |      |      |      |      |      |      |    |                                         |  |
|------------------|----|------|------|------|------|------|------|------|------|------|------|------|------|------|------|------|------|------|------|------|------|------|------|------|------|------|------|------|------|------|------|----|-----------------------------------------|--|
|                  | 1  | 2    | 3    | 4    | 5    | 6    | 7    | 8    | 9    | 10   | 11   | 12   | 13   | 14   | 15   | 16   | 17   | 18   | 19   | 20   | 21   | 22   | 23   | 24   | 25   | 26   | 27   | 28   | 29   | 30   |      |    |                                         |  |
| Divergence       | 1  |      | 99.2 | 99.3 | 99.3 | 98.5 | 98.3 | 98.3 | 98.6 | 99.3 | 98.5 | 98.4 | 98.4 | 98.5 | 99.0 | 98.2 | 75.0 | 74.6 | 74.6 | 74.7 | 74.7 | 74.6 | 75.1 | 75.0 | 74.8 | 74.7 | 74.9 | 75.1 | 74.5 | 74.8 | 74.9 | 1  | Feline-chaphamaparvovirus-MN396757.1-Ca |  |
|                  | 2  | 0.8  |      | 99.1 | 99.3 | 98.4 | 98.4 | 98.6 | 98.6 | 99.6 | 98.5 | 98.4 | 98.4 | 98.5 | 99.0 | 98.2 | 75.0 | 74.5 | 74.5 | 74.7 | 74.6 | 74.5 | 75.1 | 75.0 | 74.8 | 74.6 | 74.9 | 75.1 | 74.4 | 74.8 | 74.8 | 2  | Feline-chaphamaparvovirus-MN794869.1-US |  |
|                  | 3  | 0.7  | 0.9  |      | 99.3 | 98.5 | 98.2 | 98.2 | 98.5 | 99.2 | 98.4 | 98.3 | 98.3 | 98.4 | 98.9 | 98.1 | 75.1 | 74.6 | 74.5 | 74.8 | 74.7 | 74.5 | 75.1 | 75.1 | 74.9 | 74.7 | 75.1 | 75.1 | 74.5 | 74.9 | 74.8 | 3  | Feline_chaphamaparvovirus-MW404251.1-It |  |
|                  | 4  | 0.7  | 0.7  | 0.7  |      | 98.4 | 98.3 | 98.4 | 98.6 | 99.4 | 98.5 | 98.3 | 98.4 | 98.4 | 99.0 | 98.2 | 75.0 | 74.5 | 74.5 | 74.7 | 74.6 | 74.5 | 75.1 | 75.0 | 74.8 | 74.6 | 74.9 | 75.1 | 74.2 | 74.8 | 74.6 | 4  | Feline_chaphamaparvovirus-MW404252.1-It |  |
|                  | 5  | 1.5  | 1.6  | 1.5  | 1.6  |      | 98.7 | 97.5 | 99.1 | 98.5 | 98.8 | 98.7 | 98.8 | 98.8 | 98.5 | 98.2 | 74.9 | 74.4 | 74.3 | 74.6 | 74.5 | 74.3 | 74.9 | 74.8 | 74.7 | 74.5 | 74.7 | 74.9 | 74.4 | 74.7 | 74.8 | 5  | Feline_chaphamaparvovirus-MW404253.1-It |  |
|                  | 6  | 1.7  | 1.6  | 1.8  | 1.7  | 1.3  |      | 97.5 | 99.4 | 98.5 | 99.6 | 99.6 | 99.7 | 99.6 | 98.6 | 98.8 | 75.2 | 74.6 | 74.5 | 74.8 | 74.7 | 74.5 | 75.1 | 75.1 | 74.9 | 74.8 | 74.9 | 75.1 | 74.7 | 74.9 | 75.0 | 6  | Feline_chaphamaparvovirus-MT708230.1-Ch |  |
|                  | 7  | 1.7  | 1.4  | 1.8  | 1.6  | 2.5  | 2.6  |      | 97.7 | 99.0 | 97.6 | 97.4 | 97.5 | 97.5 | 98.1 | 97.3 | 74.1 | 73.6 | 73.6 | 73.8 | 73.7 | 73.6 | 74.1 | 74.1 | 73.9 | 73.7 | 74.0 | 74.1 | 73.6 | 74.0 | 74.0 | 7  | Feline_chaphamaparvovirus-MT708231.1-Ch |  |
|                  | 8  | 1.4  | 1.4  | 1.5  | 1.4  | 0.9  | 0.6  | 2.4  |      | 98.7 | 99.4 | 99.4 | 99.5 | 99.4 | 98.7 | 98.7 | 74.9 | 74.4 | 74.3 | 74.6 | 74.5 | 74.3 | 74.8 | 74.7 | 74.7 | 74.6 | 74.7 | 74.9 | 74.4 | 74.7 | 74.8 | 8  | Feline_chaphamaparvovirus-MZ031965.1-Ch |  |
|                  | 9  | 0.7  | 0.4  | 0.8  | 0.6  | 1.5  | 1.5  | 1.0  | 1.3  |      | 98.6 | 98.4 | 98.5 | 98.5 | 99.1 | 98.3 | 74.8 | 74.4 | 74.3 | 74.6 | 74.5 | 74.3 | 74.9 | 74.8 | 74.7 | 74.5 | 74.7 | 74.9 | 74.2 | 74.7 | 74.6 | 9  | Feline_chaphamaparvovirus-MZ031966.1-Ch |  |
|                  | 10 | 1.5  | 1.5  | 1.6  | 1.5  | 1.2  | 0.4  | 2.5  | 0.6  | 1.4  |      | 99.8 | 99.9 | 99.9 | 98.8 | 99.0 | 75.1 | 74.5 | 74.5 | 74.7 | 74.6 | 74.5 | 75.1 | 75.0 | 74.8 | 74.7 | 74.9 | 75.1 | 74.4 | 74.8 | 74.9 | 10 | Feline_chaphamaparvovirus-OP499830.1-Ch |  |
|                  | 11 | 1.6  | 1.6  | 1.7  | 1.7  | 1.3  | 0.4  | 2.6  | 0.6  | 1.6  | 0.2  |      | 99.9 | 99.9 | 98.6 | 98.8 | 75.1 | 74.5 | 74.4 | 74.7 | 74.6 | 74.4 | 75.0 | 74.9 | 74.8 | 74.7 | 74.8 | 75.0 | 74.4 | 74.8 | 74.9 | 11 | Feline_chaphamaparvovirus-OP499831.1-Ch |  |
|                  | 12 | 1.6  | 1.6  | 1.7  | 1.6  | 1.2  | 0.3  | 2.6  | 0.5  | 1.5  | 0.1  | 0.1  |      | 99.9 | 98.7 | 98.9 | 75.1 | 74.5 | 74.5 | 74.7 | 74.6 | 74.5 | 75.1 | 75.0 | 74.8 | 74.7 | 74.9 | 75.1 | 74.4 | 74.8 | 74.9 | 12 | Feline_chaphamaparvovirus-OP499832.1-Ch |  |
|                  | 13 | 1.5  | 1.5  | 1.6  | 1.6  | 1.2  | 0.4  | 2.5  | 0.6  | 1.5  | 0.1  | 0.1  | 0.1  |      | 98.7 | 98.9 | 75.2 | 74.6 | 74.5 | 74.8 | 74.7 | 74.5 | 75.1 | 75.1 | 74.9 | 74.8 | 74.9 | 75.1 | 74.5 | 74.9 | 75.0 | 13 | Feline_chaphamaparvovirus-OP499833.1-Ch |  |
|                  | 14 | 1.0  | 1.0  | 1.1  | 1.0  | 1.5  | 1.4  | 2.0  | 1.3  | 0.9  | 1.2  | 1.4  | 1.3  | 1.3  |      | 99.2 | 74.8 | 74.4 | 74.3 | 74.6 | 74.5 | 74.3 | 74.9 | 74.8 | 74.8 | 74.5 | 74.7 | 74.9 | 74.3 | 74.7 | 74.7 | 14 | Feline_chaphamaparvovirus-OQ162043.1-20 |  |
|                  | 15 | 1.8  | 1.8  | 1.9  | 1.9  | 1.9  | 1.2  | 2.8  | 1.3  | 1.7  | 1.0  | 1.2  | 1.1  | 1.1  | 0.8  |      | 74.9 | 74.3 | 74.3 | 74.5 | 74.4 | 74.3 | 74.8 | 74.8 | 74.7 | 74.4 | 74.7 | 74.8 | 74.2 | 74.6 | 74.7 | 15 | Feline_chaphamaparvovirus-OQ162042.1-20 |  |
|                  | 16 | 30.4 | 30.4 | 30.4 | 30.4 | 30.5 | 30.2 | 31.8 | 30.5 | 30.7 | 30.3 | 30.4 | 30.3 | 30.2 | 30.7 | 30.6 |      | 98.5 | 98.3 | 98.9 | 98.7 | 98.7 | 99.2 | 99.1 | 98.8 | 98.8 | 99.0 | 99.2 | 94.5 | 98.8 | 94.8 | 16 | Carnivore_chapparvovirus-MK448316.1-USA |  |
|                  | 17 | 31.0 | 31.1 | 31.1 | 31.1 | 31.4 | 31.1 | 32.5 | 31.4 | 31.4 | 31.1 | 31.2 | 31.1 | 31.1 | 31.4 | 31.4 | 1.5  |      | 99.2 | 98.4 | 98.8 | 98.8 | 98.7 | 98.6 | 99.2 | 99.0 | 98.9 | 99.1 | 94.1 | 98.7 | 94.3 | 17 | Carnivore_chapparvovirus-MT123283.1-Chi |  |
|                  | 18 | 31.1 | 31.2 | 31.1 | 31.2 | 31.4 | 31.1 | 32.6 | 31.5 | 31.5 | 31.2 | 31.3 | 31.2 | 31.1 | 31.5 | 31.5 | 1.7  | 0.8  |      | 98.2 | 98.6 | 98.7 | 98.5 | 98.4 | 98.9 | 98.7 | 98.7 | 98.9 | 94.0 | 98.4 | 94.2 | 18 | Carnivore_chapparvovirus-MT123284.1-Chi |  |
|                  | 19 | 30.8 | 30.8 | 30.7 | 30.8 | 31.0 | 30.7 | 32.2 | 31.0 | 31.1 | 30.8 | 30.9 | 30.8 | 30.7 | 31.1 | 31.1 | 1.1  | 1.6  | 1.8  |      | 98.8 | 98.6 | 98.9 | 98.8 | 98.8 | 98.7 | 98.9 | 99.1 | 94.3 | 98.7 | 94.7 | 19 | Carnivore_chapparvovirus-MT123285.1-Chi |  |
|                  | 20 | 30.8 | 31.0 | 30.9 | 31.0 | 31.2 | 30.9 | 32.4 | 31.2 | 31.2 | 31.0 | 31.0 | 31.0 | 30.9 | 31.2 | 31.3 | 1.3  | 1.2  | 1.4  | 1.2  |      | 99.1 | 98.6 | 98.5 | 99.0 | 99.1 | 98.8 | 99.0 | 94.3 | 98.6 | 94.4 | 20 | Carnivore_chapparvovirus-MT123286.1-Chi |  |
|                  | 21 | 31.1 | 31.2 | 31.1 | 31.2 | 31.4 | 31.1 | 32.6 | 31.4 | 31.4 | 31.2 | 31.3 | 31.2 | 31.1 | 31.4 | 31.5 | 1.3  | 1.2  | 1.3  | 1.4  | 0.9  |      | 98.6 | 98.5 | 99.0 | 99.1 | 98.8 | 99.0 | 94.0 | 98.5 | 94.2 | 21 | Carnivore_chapparvovirus-MT123287.1-Chi |  |
|                  | 22 | 30.4 | 30.4 | 30.3 | 30.4 | 30.6 | 30.3 | 31.7 | 30.7 | 30.6 | 30.4 | 30.4 | 30.4 | 30.3 | 30.6 | 30.7 | 0.8  | 1.3  | 1.5  | 1.1  | 1.4  | 1.4  |      | 99.9 | 99.0 | 98.7 | 99.3 | 99.4 | 94.6 | 98.9 | 94.8 | 22 | Carnivore_chapparvovirus-MT710947.1-Ita |  |
|                  | 23 | 30.4 | 30.4 | 30.4 | 30.4 | 30.7 | 30.4 | 31.8 | 30.8 | 30.7 | 30.4 | 30.5 | 30.4 | 30.4 | 30.7 | 30.7 | 0.9  | 1.4  | 1.6  | 1.2  | 1.5  | 1.5  | 0.1  |      | 98.9 | 98.6 | 99.2 | 99.3 | 94.6 | 98.8 | 94.8 | 23 | Carnivore_chapparvovirus-MT710948.1-Ita |  |
|                  | 24 | 30.7 | 30.7 | 30.6 | 30.7 | 30.9 | 30.6 | 32.1 | 30.9 | 30.9 | 30.7 | 30.7 | 30.7 | 30.6 | 30.8 | 30.8 | 1.2  | 0.8  | 1.1  | 1.2  | 1.0  | 1.0  | 1.0  | 1.1  |      | 99.3 | 99.2 | 99.4 | 94.4 | 99.0 | 94.6 | 24 | Carnivore_chapparvovirus-MN928790.1-Chi |  |
|                  | 25 | 30.8 | 31.0 | 30.9 | 31.0 | 31.2 | 30.7 | 32.4 | 31.1 | 31.2 | 30.8 | 30.9 | 30.8 | 30.7 | 31.2 | 31.3 | 1.2  | 1.0  | 1.3  | 1.3  | 0.9  | 0.9  | 1.3  | 1.4  | 0.7  |      | 98.9 | 99.1 | 94.2 | 98.7 | 94.4 | 25 | Carnivore_chapparvovirus-MN928791.1-Chi |  |
|                  | 26 | 30.6 | 30.6 | 30.4 | 30.6 | 30.8 | 30.5 | 32.0 | 30.8 | 30.8 | 30.6 | 30.7 | 30.6 | 30.5 | 30.8 | 30.9 | 1.0  | 1.1  | 1.3  | 1.1  | 1.2  | 1.2  | 0.7  | 0.8  | 0.8  | 1.1  |      | 99.6 | 94.6 | 99.0 | 94.7 | 26 | Carnivore_chapparvovirus-OK546100.1-Can |  |
|                  | 27 | 30.4 | 30.4 | 30.3 | 30.4 | 30.6 | 30.3 | 31.7 | 30.6 | 30.6 | 30.4 | 30.4 | 30.4 | 30.3 | 30.6 | 30.7 | 0.8  | 0.9  | 1.1  | 0.9  | 1.0  | 1.0  | 0.6  | 0.7  | 0.6  | 0.9  | 0.4  |      | 94.6 | 99.3 | 94.8 | 27 | Carnivore_chapparvovirus-OK546101.1-Can |  |
|                  | 28 | 31.1 | 31.4 | 31.2 | 31.6 | 31.4 | 30.9 | 32.6 | 31.4 | 31.6 | 31.3 | 31.4 | 31.3 | 31.2 | 31.5 | 31.7 | 5.8  | 6.2  | 6.3  | 6.0  | 5.9  | 6.3  | 5.6  | 5.6  | 5.8  | 6.1  | 5.6  | 5.7  |      | 94.6 | 97.8 | 28 | Carnivore_chapparvovirus-OK546102.1-Can |  |
|                  | 29 | 30.7 | 30.7 | 30.6 | 30.7 | 30.9 | 30.6 | 32.0 | 30.9 | 30.9 | 30.7 | 30.7 | 30.7 | 30.6 | 30.9 | 31.0 | 1.2  | 1.3  | 1.6  | 1.3  | 1.4  | 1.5  | 1.1  | 1.2  | 1.0  | 1.3  | 1.0  | 0.7  | 5.6  |      | 94.8 | 29 | Carnivore_chapparvovirus-OM640108.1-Can |  |
|                  | 30 | 30.5 | 30.7 | 30.7 | 31.0 | 30.7 | 30.4 | 32.0 | 30.7 | 31.0 | 30.5 | 30.6 | 30.5 | 30.4 | 30.9 | 30.9 | 5.4  | 6.0  | 6.1  | 5.5  | 5.8  | 6.0  | 5.4  | 5.4  | 5.6  | 5.9  | 5.5  | 5.4  | 2.2  | 5.4  |      | 30 | Carnivore_chapparvovirus-OM640109.1-Can |  |
|                  | 1  | 2    | 3    | 4    | 5    | 6    | 7    | 8    | 9    | 10   | 11   | 12   | 13   | 14   | 15   | 16   | 17   | 18   | 19   | 20   | 21   | 22   | 23   | 24   | 25   | 26   | 27   | 28   | 29   | 30   |      |    |                                         |  |



|            |    | Percent Identity |      |      |      |      |      |      |      |      |      |      |      |       |      |      |      |      |      |      |      |      |      |      |      |      |      |      |      |      |      |    |                                         |
|------------|----|------------------|------|------|------|------|------|------|------|------|------|------|------|-------|------|------|------|------|------|------|------|------|------|------|------|------|------|------|------|------|------|----|-----------------------------------------|
|            |    | 1                | 2    | 3    | 4    | 5    | 6    | 7    | 8    | 9    | 10   | 11   | 12   | 13    | 14   | 15   | 16   | 17   | 18   | 19   | 20   | 21   | 22   | 23   | 24   | 25   | 26   | 27   | 28   | 29   | 30   |    |                                         |
| Divergence | 1  |                  | 99.2 | 98.9 | 99.4 | 97.9 | 97.9 | 97.0 | 98.5 | 99.5 | 97.9 | 97.6 | 97.7 | 97.9  | 98.8 | 97.7 | 66.3 | 66.0 | 65.7 | 66.1 | 65.7 | 65.7 | 66.6 | 66.4 | 66.4 | 65.8 | 66.6 | 66.7 | 66.6 | 66.6 | 67.0 | 1  | Feline-chaphamaparvovirus-MN396757.1-Ca |
|            | 2  | 0.8              |      | 98.8 | 99.2 | 97.7 | 97.7 | 97.1 | 98.3 | 99.7 | 97.7 | 97.4 | 97.6 | 97.7  | 98.6 | 97.6 | 65.9 | 65.6 | 65.3 | 65.7 | 65.3 | 65.3 | 66.2 | 66.0 | 66.0 | 65.4 | 66.2 | 66.3 | 66.2 | 66.2 | 66.6 | 2  | Feline-chaphamaparvovirus-MN794869.1-US |
|            | 3  | 1.1              | 1.2  |      | 98.9 | 97.7 | 97.4 | 96.5 | 98.0 | 99.1 | 97.4 | 97.1 | 97.3 | 97.4  | 98.3 | 97.3 | 66.3 | 66.0 | 65.7 | 66.1 | 65.7 | 65.7 | 66.6 | 66.4 | 66.4 | 65.8 | 66.6 | 66.7 | 66.6 | 66.6 | 67.0 | 3  | Feline_chaphamaparvovirus-MW404251.1-It |
|            | 4  | 0.6              | 0.8  | 1.1  |      | 97.9 | 97.9 | 97.0 | 98.5 | 99.5 | 97.9 | 97.6 | 97.7 | 97.9  | 98.8 | 97.7 | 66.1 | 65.8 | 65.5 | 66.0 | 65.5 | 65.5 | 66.4 | 66.3 | 66.3 | 65.7 | 66.4 | 66.6 | 66.4 | 66.4 | 66.9 | 4  | Feline_chaphamaparvovirus-MW404252.1-It |
|            | 5  | 2.2              | 2.3  | 2.3  | 2.2  |      | 97.6 | 95.4 | 98.5 | 98.0 | 97.6 | 97.3 | 97.4 | 97.6  | 97.3 | 96.8 | 65.7 | 65.2 | 64.9 | 65.3 | 64.9 | 64.9 | 65.8 | 65.7 | 65.7 | 65.0 | 65.8 | 66.0 | 65.8 | 65.8 | 66.3 | 5  | Feline_chaphamaparvovirus-MW404253.1-It |
|            | 6  | 2.2              | 2.3  | 2.6  | 2.2  | 2.5  |      | 95.4 | 99.1 | 98.0 | 99.7 | 99.7 | 99.8 | 99.7  | 97.9 | 98.0 | 66.1 | 65.7 | 65.3 | 65.8 | 65.3 | 65.3 | 66.3 | 66.1 | 66.1 | 65.8 | 66.3 | 66.4 | 66.3 | 66.3 | 66.7 | 6  | Feline_chaphamaparvovirus-MT708230.1-Ch |
|            | 7  | 3.1              | 2.9  | 3.6  | 3.1  | 4.7  | 4.7  |      | 96.0 | 97.4 | 95.4 | 95.1 | 95.3 | 95.4  | 96.4 | 95.3 | 64.4 | 64.1 | 63.8 | 64.4 | 64.0 | 63.8 | 64.7 | 64.6 | 64.6 | 64.0 | 64.7 | 64.9 | 64.6 | 64.7 | 65.0 | 7  | Feline_chaphamaparvovirus-MT708231.1-Ch |
|            | 8  | 1.5              | 1.7  | 2.0  | 1.5  | 1.5  | 0.9  | 4.1  |      | 98.6 | 98.8 | 98.8 | 98.9 | 98.8  | 97.9 | 97.7 | 65.8 | 65.3 | 65.0 | 65.5 | 65.0 | 65.0 | 66.0 | 65.8 | 65.8 | 65.5 | 66.0 | 66.1 | 66.0 | 66.0 | 66.4 | 8  | Feline_chaphamaparvovirus-MZ031965.1-Ch |
|            | 9  | 0.5              | 0.3  | 0.9  | 0.5  | 2.0  | 2.0  | 2.6  | 1.4  |      | 98.0 | 97.7 | 97.9 | 98.0  | 98.9 | 97.9 | 66.1 | 65.8 | 65.5 | 66.0 | 65.5 | 65.5 | 66.4 | 66.3 | 66.3 | 65.7 | 66.4 | 66.6 | 66.4 | 66.4 | 66.9 | 9  | Feline_chaphamaparvovirus-MZ031966.1-Ch |
|            | 10 | 2.2              | 2.3  | 2.6  | 2.2  | 2.5  | 0.3  | 4.7  | 1.2  | 2.0  |      | 99.7 | 99.8 | 100.0 | 97.9 | 98.0 | 66.3 | 65.8 | 65.5 | 66.0 | 65.5 | 65.5 | 66.4 | 66.3 | 66.3 | 66.0 | 66.4 | 66.6 | 66.4 | 66.4 | 66.9 | 10 | Feline_chaphamaparvovirus-OP499830.1-Ch |
|            | 11 | 2.5              | 2.6  | 2.9  | 2.5  | 2.8  | 0.3  | 5.0  | 1.2  | 2.3  | 0.3  |      | 99.8 | 99.7  | 97.6 | 97.7 | 66.1 | 65.7 | 65.3 | 65.8 | 65.3 | 65.3 | 66.3 | 66.1 | 66.1 | 65.8 | 66.3 | 66.4 | 66.3 | 66.3 | 66.7 | 11 | Feline_chaphamaparvovirus-OP499831.1-Ch |
|            | 12 | 2.3              | 2.5  | 2.8  | 2.3  | 2.6  | 0.2  | 4.9  | 1.1  | 2.2  | 0.2  | 0.2  |      | 99.8  | 97.7 | 97.9 | 66.1 | 65.7 | 65.3 | 65.8 | 65.3 | 65.3 | 66.3 | 66.1 | 66.1 | 65.8 | 66.3 | 66.4 | 66.3 | 66.3 | 66.7 | 12 | Feline_chaphamaparvovirus-OP499832.1-Ch |
|            | 13 | 2.2              | 2.3  | 2.6  | 2.2  | 2.5  | 0.3  | 4.7  | 1.2  | 2.0  | 0.0  | 0.3  | 0.2  |       | 97.9 | 98.0 | 66.3 | 65.8 | 65.5 | 66.0 | 65.5 | 65.5 | 66.4 | 66.3 | 66.3 | 66.0 | 66.4 | 66.6 | 66.4 | 66.4 | 66.9 | 13 | Feline_chaphamaparvovirus-OP499833.1-Ch |
|            | 14 | 1.2              | 1.4  | 1.7  | 1.2  | 2.8  | 2.2  | 3.7  | 2.2  | 1.1  | 2.2  | 2.5  | 2.3  | 2.2   |      | 98.9 | 65.8 | 65.5 | 65.2 | 65.7 | 65.2 | 65.2 | 66.1 | 66.0 | 66.0 | 65.3 | 66.1 | 66.3 | 66.1 | 66.1 | 66.6 | 14 | Feline_chaphamaparvovirus-OQ162043.1-20 |
|            | 15 | 2.3              | 2.5  | 2.8  | 2.3  | 3.3  | 2.0  | 4.9  | 2.3  | 2.2  | 2.0  | 2.3  | 2.2  | 2.0   | 1.1  |      | 65.8 | 65.3 | 65.0 | 65.5 | 65.0 | 65.0 | 66.0 | 65.8 | 65.8 | 65.2 | 66.0 | 66.1 | 66.0 | 66.0 | 66.4 | 15 | Feline_chaphamaparvovirus-OQ162042.1-20 |
|            | 16 | 44.7             | 45.4 | 44.7 | 44.9 | 45.7 | 44.9 | 48.0 | 45.5 | 44.9 | 44.7 | 44.9 | 44.9 | 44.7  | 45.5 | 45.5 |      | 98.2 | 97.7 | 98.6 | 98.5 | 98.3 | 98.9 | 98.8 | 98.9 | 98.6 | 99.1 | 99.2 | 96.4 | 98.6 | 96.4 | 16 | Carnivore_chapparvovirus-MK448316.1-USA |
|            | 17 | 45.2             | 45.9 | 45.2 | 45.5 | 46.6 | 45.7 | 48.5 | 46.3 | 45.5 | 45.5 | 45.7 | 45.7 | 45.5  | 46.0 | 46.3 | 1.8  |      | 98.3 | 97.9 | 98.0 | 97.9 | 98.6 | 98.5 | 98.9 | 98.2 | 98.8 | 98.9 | 96.4 | 98.3 | 96.1 | 17 | Carnivore_chapparvovirus-MT123283.1-Chi |
|            | 18 | 45.7             | 46.5 | 45.7 | 46.0 | 47.1 | 46.3 | 49.1 | 46.8 | 46.0 | 46.0 | 46.3 | 46.3 | 46.0  | 46.6 | 46.8 | 2.3  | 1.7  |      | 97.4 | 97.6 | 97.7 | 98.2 | 98.0 | 98.5 | 97.7 | 98.3 | 98.5 | 96.2 | 98.0 | 95.9 | 18 | Carnivore_chapparvovirus-MT123284.1-Chi |
|            | 19 | 44.9             | 45.6 | 44.9 | 45.2 | 46.3 | 45.5 | 48.0 | 46.0 | 45.2 | 45.2 | 45.5 | 45.5 | 45.2  | 45.7 | 46.0 | 1.4  | 2.1  | 2.6  |      | 98.9 | 98.2 | 98.6 | 98.5 | 98.6 | 98.5 | 98.8 | 98.9 | 96.4 | 98.3 | 96.1 | 19 | Carnivore_chapparvovirus-MT123285.1-Chi |
|            | 20 | 45.7             | 46.5 | 45.7 | 46.0 | 47.1 | 46.3 | 48.8 | 46.8 | 46.0 | 46.0 | 46.3 | 46.3 | 46.0  | 46.6 | 46.8 | 1.5  | 2.0  | 2.5  | 1.1  |      | 98.6 | 98.5 | 98.3 | 98.8 | 98.6 | 98.6 | 98.8 | 96.5 | 98.5 | 96.2 | 20 | Carnivore_chapparvovirus-MT123286.1-Chi |
|            | 21 | 45.7             | 46.5 | 45.7 | 46.0 | 47.1 | 46.3 | 49.1 | 46.8 | 46.0 | 46.0 | 46.3 | 46.3 | 46.0  | 46.6 | 46.8 | 1.7  | 2.1  | 2.3  | 1.8  | 1.4  |      | 98.3 | 98.2 | 98.6 | 98.5 | 98.5 | 98.6 | 96.2 | 98.0 | 95.9 | 21 | Carnivore_chapparvovirus-MT123287.1-Chi |
|            | 22 | 44.1             | 44.8 | 44.1 | 44.4 | 45.5 | 44.7 | 47.4 | 45.2 | 44.4 | 44.4 | 44.7 | 44.7 | 44.4  | 44.9 | 45.2 | 1.1  | 1.4  | 1.8  | 1.4  | 1.5  | 1.7  |      | 99.8 | 99.4 | 98.6 | 99.5 | 99.7 | 96.8 | 99.1 | 96.5 | 22 | Carnivore_chapparvovirus-MT710947.1-Ita |
|            | 23 | 44.4             | 45.1 | 44.4 | 44.7 | 45.7 | 44.9 | 47.7 | 45.5 | 44.7 | 44.7 | 44.9 | 44.9 | 44.7  | 45.2 | 45.5 | 1.2  | 1.5  | 2.0  | 1.5  | 1.7  | 1.8  | 0.2  |      | 99.2 | 98.5 | 99.4 | 99.5 | 96.7 | 98.9 | 96.4 | 23 | Carnivore_chapparvovirus-MT710948.1-Ita |
|            | 24 | 44.4             | 45.1 | 44.4 | 44.7 | 45.7 | 44.9 | 47.7 | 45.5 | 44.7 | 44.7 | 44.9 | 44.9 | 44.7  | 45.2 | 45.5 | 1.1  | 1.1  | 1.5  | 1.4  | 1.2  | 1.4  | 0.6  | 0.8  |      | 98.9 | 99.5 | 99.7 | 97.1 | 99.1 | 96.8 | 24 | Carnivore_chapparvovirus-MN928790.1-Chi |
|            | 25 | 45.5             | 46.2 | 45.5 | 45.7 | 46.8 | 45.5 | 48.8 | 46.0 | 45.7 | 45.2 | 45.5 | 45.5 | 45.2  | 46.3 | 46.6 | 1.4  | 1.8  | 2.3  | 1.5  | 1.4  | 1.5  | 1.4  | 1.5  | 1.1  |      | 98.8 | 98.9 | 96.4 | 98.3 | 96.1 | 25 | Carnivore_chapparvovirus-MN928791.1-Chi |
|            | 26 | 44.1             | 44.8 | 44.1 | 44.4 | 45.5 | 44.7 | 47.4 | 45.2 | 44.4 | 44.4 | 44.7 | 44.7 | 44.4  | 44.9 | 45.2 | 0.9  | 1.2  | 1.7  | 1.2  | 1.4  | 1.5  | 0.5  | 0.6  | 0.5  | 1.2  |      | 99.8 | 97.0 | 99.2 | 96.7 | 26 | Carnivore_chapparvovirus-OK546100.1-Can |
|            | 27 | 43.8             | 44.6 | 43.8 | 44.1 | 45.2 | 44.4 | 47.1 | 44.9 | 44.1 | 44.1 | 44.4 | 44.4 | 44.1  | 44.7 | 44.9 | 0.8  | 1.1  | 1.5  | 1.1  | 1.2  | 1.4  | 0.3  | 0.5  | 0.3  | 1.1  | 0.2  |      | 97.1 | 99.4 | 96.8 | 27 | Carnivore_chapparvovirus-OK546101.1-Can |
|            | 28 | 44.1             | 44.8 | 44.1 | 44.4 | 45.5 | 44.7 | 47.7 | 45.2 | 44.4 | 44.4 | 44.7 | 44.7 | 44.4  | 44.9 | 45.2 | 3.7  | 3.7  | 3.9  | 3.7  | 3.6  | 3.9  | 3.2  | 3.4  | 2.9  | 3.7  | 3.1  | 2.9  |      | 97.1 | 98.2 | 28 | Carnivore_chapparvovirus-OK546102.1-Can |
|            | 29 | 44.1             | 44.8 | 44.1 | 44.4 | 45.5 | 44.7 | 47.4 | 45.2 | 44.4 | 44.4 | 44.7 | 44.7 | 44.4  | 44.9 | 45.2 | 1.4  | 1.7  | 2.0  | 1.7  | 1.5  | 2.0  | 0.9  | 1.1  | 0.9  | 1.7  | 0.8  | 0.6  | 2.9  |      | 96.8 | 29 | Carnivore_chapparvovirus-OM640108.1-Can |
|            | 30 | 43.3             | 44.0 | 43.3 | 43.6 | 44.7 | 43.8 | 46.8 | 44.4 | 43.6 | 43.6 | 43.8 | 43.8 | 43.6  | 44.1 | 44.4 | 3.7  | 4.0  | 4.2  | 4.0  | 3.9  | 4.2  | 3.6  | 3.7  | 3.2  | 4.0  | 3.4  | 3.2  | 1.8  | 3.2  |      | 30 | Carnivore_chapparvovirus-OM640109.1-Can |
|            |    | 1                | 2    | 3    | 4    | 5    | 6    | 7    | 8    | 9    | 10   | 11   | 12   | 13    | 14   | 15   | 16   | 17   | 18   | 19   | 20   | 21   | 22   | 23   | 24   | 25   | 26   | 27   | 28   | 29   | 30   |    |                                         |



| Divergence | Percent Identity |      |      |      |      |      |      |      |      |       |      |      |      |       |      |      |      |      |      |      |      |      |      |      |      |      |      |      |      |      |      |      |      |      |    |                                         |
|------------|------------------|------|------|------|------|------|------|------|------|-------|------|------|------|-------|------|------|------|------|------|------|------|------|------|------|------|------|------|------|------|------|------|------|------|------|----|-----------------------------------------|
|            | 1                | 2    | 3    | 4    | 5    | 6    | 7    | 8    | 9    | 10    | 11   | 12   | 13   | 14    | 15   | 16   | 17   | 18   | 19   | 20   | 21   | 22   | 23   | 24   | 25   | 26   | 27   | 28   | 29   | 30   | 31   | 32   | 33   |      |    |                                         |
|            | 1                |      |      |      |      |      |      |      |      |       |      |      |      |       |      |      |      |      |      |      |      |      |      |      |      |      |      |      |      |      |      |      |      |      |    |                                         |
|            | 1                |      | 99.3 | 99.5 | 99.5 | 99.2 | 98.6 | 99.5 | 98.9 | 99.5  | 98.8 | 98.7 | 98.6 | 98.7  | 99.6 | 99.5 | 98.5 | 99.3 | 98.3 | 73.0 | 72.8 | 73.0 | 72.8 | 72.9 | 73.0 | 73.1 | 73.1 | 72.8 | 72.9 | 73.2 | 73.1 | 72.9 | 72.9 | 72.7 | 1  | Feline_chaphamaparvovirus-MN396757.1-Ca |
|            | 2                | 0.7  |      | 99.4 | 99.2 | 99.1 | 98.4 | 99.5 | 98.6 | 99.5  | 98.4 | 98.3 | 98.2 | 98.3  | 99.5 | 99.4 | 98.1 | 98.8 | 98.0 | 72.9 | 72.7 | 72.9 | 72.7 | 72.9 | 72.9 | 73.0 | 73.0 | 72.9 | 72.9 | 73.1 | 73.1 | 72.8 | 72.8 | 72.6 | 2  | Feline_chaphamaparvovirus-MN794869.1-US |
|            | 3                | 0.5  | 0.6  |      | 99.5 | 99.5 | 98.4 | 99.6 | 98.7 | 99.6  | 98.6 | 98.5 | 98.4 | 98.5  | 99.8 | 99.7 | 98.4 | 99.0 | 98.1 | 73.0 | 72.9 | 73.1 | 72.9 | 73.0 | 73.1 | 73.1 | 73.1 | 72.9 | 73.0 | 73.3 | 73.2 | 72.7 | 72.9 | 72.6 | 3  | Feline_chaphamaparvovirus-MW404251.1-It |
|            | 4                | 0.5  | 0.8  | 0.5  |      | 99.2 | 98.4 | 99.4 | 98.9 | 99.4  | 98.5 | 98.4 | 98.3 | 98.4  | 99.6 | 99.5 | 98.4 | 99.0 | 98.2 | 73.1 | 72.9 | 73.1 | 72.9 | 73.1 | 73.3 | 73.2 | 73.2 | 73.1 | 73.1 | 73.3 | 73.3 | 73.0 | 73.0 | 72.7 | 4  | Feline_chaphamaparvovirus-MW404252.1-It |
|            | 5                | 0.8  | 0.9  | 0.5  | 0.8  |      | 98.2 | 99.3 | 98.5 | 99.3  | 98.2 | 98.3 | 98.2 | 98.3  | 99.5 | 99.4 | 98.1 | 98.6 | 97.8 | 73.0 | 72.9 | 73.1 | 72.9 | 73.0 | 73.1 | 73.1 | 73.1 | 72.9 | 73.1 | 73.3 | 73.2 | 72.7 | 72.9 | 72.6 | 5  | Feline_chaphamaparvovirus-MW404253.1-It |
|            | 6                | 1.4  | 1.6  | 1.6  | 1.7  | 1.8  |      | 98.8 | 98.8 | 98.8  | 98.7 | 98.8 | 98.6 | 98.8  | 98.5 | 98.4 | 98.0 | 98.4 | 98.1 | 72.8 | 72.4 | 72.6 | 72.4 | 72.6 | 72.6 | 72.7 | 72.7 | 72.4 | 72.6 | 72.9 | 72.8 | 72.4 | 72.5 | 72.2 | 6  | Feline_chaphamaparvovirus-MT708230.1-Ch |
|            | 7                | 0.5  | 0.5  | 0.4  | 0.6  | 0.7  | 1.2  |      | 98.8 | 100.0 | 98.6 | 98.5 | 98.4 | 98.5  | 99.7 | 99.6 | 98.3 | 99.0 | 98.2 | 73.2 | 73.0 | 73.2 | 73.0 | 73.1 | 73.2 | 73.3 | 73.3 | 73.0 | 73.1 | 73.4 | 73.3 | 72.9 | 73.1 | 72.8 | 7  | Feline_chaphamaparvovirus-MT708231.1-Ch |
|            | 8                | 1.1  | 1.5  | 1.3  | 1.1  | 1.5  | 1.2  | 1.2  |      | 98.8  | 99.1 | 99.1 | 99.0 | 99.1  | 98.8 | 98.7 | 98.6 | 99.1 | 98.5 | 72.8 | 72.6 | 72.8 | 72.7 | 72.7 | 72.8 | 72.9 | 72.9 | 72.6 | 72.7 | 73.0 | 72.9 | 72.5 | 72.6 | 72.4 | 8  | Feline_chaphamaparvovirus-MZ031965.1-Ch |
|            | 9                | 0.5  | 0.5  | 0.4  | 0.6  | 0.7  | 1.2  | 0.0  | 1.2  |       | 98.6 | 98.5 | 98.4 | 98.5  | 99.7 | 99.6 | 98.3 | 99.0 | 98.2 | 73.2 | 73.0 | 73.2 | 73.0 | 73.1 | 73.2 | 73.3 | 73.3 | 73.0 | 73.1 | 73.4 | 73.3 | 72.9 | 73.1 | 72.8 | 9  | Feline_chaphamaparvovirus-MZ031966.1-Ch |
|            | 10               | 1.3  | 1.7  | 1.5  | 1.5  | 1.8  | 1.3  | 1.5  | 0.9  | 1.5   |      | 99.9 | 99.8 | 99.9  | 98.6 | 98.6 | 98.7 | 99.0 | 98.5 | 72.5 | 72.3 | 72.5 | 72.3 | 72.4 | 72.5 | 72.6 | 72.6 | 72.3 | 72.4 | 72.7 | 72.6 | 72.2 | 72.4 | 72.1 | 10 | Feline_chaphamaparvovirus-OP499830.1-Ch |
|            | 11               | 1.3  | 1.7  | 1.5  | 1.6  | 1.7  | 1.3  | 1.5  | 0.9  | 1.5   | 0.1  |      | 99.9 | 100.0 | 98.6 | 98.5 | 98.6 | 98.9 | 98.4 | 72.6 | 72.3 | 72.5 | 72.3 | 72.4 | 72.5 | 72.6 | 72.6 | 72.3 | 72.4 | 72.7 | 72.6 | 72.2 | 72.4 | 72.1 | 11 | Feline_chaphamaparvovirus-OP499831.1-Ch |
|            | 12               | 1.5  | 1.9  | 1.7  | 1.7  | 1.9  | 1.4  | 1.7  | 1.0  | 1.7   | 0.2  | 0.1  |      | 99.9  | 98.4 | 98.4 | 98.5 | 98.8 | 98.3 | 72.5 | 72.2 | 72.4 | 72.2 | 72.4 | 72.4 | 72.5 | 72.5 | 72.2 | 72.4 | 72.6 | 72.6 | 72.2 | 72.3 | 72.0 | 12 | Feline_chaphamaparvovirus-OP499832.1-Ch |
|            | 13               | 1.3  | 1.7  | 1.5  | 1.6  | 1.7  | 1.3  | 1.5  | 0.9  | 1.5   | 0.1  | 0.0  | 0.1  |       | 98.6 | 98.5 | 98.6 | 98.9 | 98.4 | 72.6 | 72.3 | 72.5 | 72.3 | 72.4 | 72.5 | 72.6 | 72.6 | 72.3 | 72.4 | 72.7 | 72.6 | 72.2 | 72.4 | 72.1 | 13 | Feline_chaphamaparvovirus-OP499833.1-Ch |
|            | 14               | 0.4  | 0.5  | 0.2  | 0.4  | 0.5  | 1.5  | 0.3  | 1.3  | 0.3   | 1.4  | 1.5  | 1.6  | 1.5   |      | 99.8 | 98.5 | 99.0 | 98.2 | 73.1 | 72.9 | 73.1 | 72.9 | 73.1 | 73.1 | 73.2 | 73.2 | 72.9 | 73.1 | 73.3 | 73.3 | 72.9 | 73.0 | 72.7 | 14 | Feline_chaphamaparvovirus-MW404254.1-It |
|            | 15               | 0.5  | 0.6  | 0.3  | 0.5  | 0.6  | 1.6  | 0.4  | 1.3  | 0.4   | 1.5  | 1.5  | 1.7  | 1.5   | 0.2  |      | 98.4 | 99.0 | 98.1 | 73.0 | 72.8 | 73.0 | 72.8 | 72.9 | 73.0 | 73.1 | 73.1 | 72.8 | 72.9 | 73.2 | 73.1 | 72.7 | 72.9 | 72.6 | 15 | Feline_chaphamaparvovirus-MW404255.1-It |
|            | 16               | 1.5  | 1.9  | 1.6  | 1.7  | 1.9  | 2.0  | 1.7  | 1.5  | 1.7   | 1.3  | 1.4  | 1.5  | 1.4   | 1.5  | 1.6  |      | 98.3 | 97.8 | 72.5 | 72.3 | 72.5 | 72.3 | 72.4 | 72.5 | 72.6 | 72.6 | 72.3 | 72.4 | 72.7 | 72.6 | 72.2 | 72.4 | 72.1 | 16 | Feline_chaphamaparvovirus-MZ712100.1-Tu |
|            | 17               | 0.7  | 1.3  | 1.1  | 1.0  | 1.4  | 1.6  | 1.1  | 0.9  | 1.1   | 1.1  | 1.1  | 1.3  | 1.1   | 1.0  | 1.1  | 1.7  |      | 99.0 | 72.8 | 72.6 | 72.8 | 72.6 | 72.7 | 72.8 | 72.9 | 72.9 | 72.6 | 72.7 | 73.0 | 72.9 | 72.6 | 72.6 | 72.6 | 17 | Feline_chaphamaparvovirus-OQ162043.1-20 |
|            | 18               | 1.7  | 2.0  | 1.9  | 1.9  | 2.3  | 1.9  | 1.8  | 1.5  | 1.8   | 1.5  | 1.6  | 1.7  | 1.6   | 1.9  | 1.9  | 2.2  | 1.0  |      | 72.7 | 72.5 | 72.6 | 72.5 | 72.6 | 72.7 | 72.8 | 72.8 | 72.6 | 72.6 | 72.9 | 72.9 | 72.3 | 72.5 | 72.2 | 18 | Feline_chaphamaparvovirus-OQ162042.1-20 |
|            | 19               | 33.6 | 33.7 | 33.5 | 33.4 | 33.5 | 33.9 | 33.3 | 33.8 | 33.3  | 34.3 | 34.2 | 34.3 | 34.2  | 33.4 | 33.6 | 34.3 | 33.9 | 34.0 |      | 98.7 | 98.9 | 99.0 | 98.6 | 99.1 | 99.1 | 99.1 | 98.7 | 98.9 | 99.1 | 99.5 | 92.9 | 99.0 | 92.6 | 19 | Carnivore_chapparvovirus-MK448316.1-USA |
|            | 20               | 33.8 | 33.9 | 33.7 | 33.6 | 33.7 | 34.4 | 33.5 | 34.2 | 33.5  | 34.6 | 34.6 | 34.7 | 34.6  | 33.6 | 33.8 | 34.6 | 34.2 | 34.3 | 1.3  |      | 98.2 | 98.2 | 98.3 | 98.4 | 99.2 | 99.3 | 98.0 | 98.1 | 98.6 | 98.9 | 92.7 | 98.3 | 92.5 | 20 | Carnivore_chapparvovirus-MT123283.1-Chi |
|            | 21               | 33.5 | 33.6 | 33.4 | 33.3 | 33.4 | 34.1 | 33.2 | 33.8 | 33.2  | 34.3 | 34.3 | 34.4 | 34.3  | 33.3 | 33.5 | 34.3 | 33.8 | 34.1 | 1.1  | 1.9  |      | 98.9 | 98.6 | 99.2 | 98.5 | 98.6 | 98.9 | 99.4 | 98.7 | 99.1 | 92.6 | 98.9 | 92.3 | 21 | Carnivore_chapparvovirus-MT123284.1-Chi |
|            | 22               | 33.8 | 33.9 | 33.7 | 33.6 | 33.7 | 34.4 | 33.5 | 33.9 | 33.5  | 34.6 | 34.6 | 34.7 | 34.6  | 33.6 | 33.8 | 34.6 | 34.2 | 34.3 | 1.0  | 1.8  | 1.1  |      | 98.8 | 99.1 | 98.6 | 98.7 | 98.7 | 98.8 | 98.8 | 99.2 | 92.3 | 98.8 | 92.1 | 22 | Carnivore_chapparvovirus-MT123          |



Divergence

| Percent Identity |      |      |      |      |      |      |      |      |       |      |      |      |       |      |      |      |      |      |      |      |      |      |      |      |      |      |      |      |      |      |      |      |      |    |
|------------------|------|------|------|------|------|------|------|------|-------|------|------|------|-------|------|------|------|------|------|------|------|------|------|------|------|------|------|------|------|------|------|------|------|------|----|
|                  | 1    | 2    | 3    | 4    | 5    | 6    | 7    | 8    | 9     | 10   | 11   | 12   | 13    | 14   | 15   | 16   | 17   | 18   | 19   | 20   | 21   | 22   | 23   | 24   | 25   | 26   | 27   | 28   | 29   | 30   | 31   | 32   | 33   |    |
| 1                |      | 99.6 | 99.6 | 99.8 | 98.6 | 97.6 | 99.8 | 98.4 | 99.8  | 98.6 | 98.4 | 98.2 | 98.4  | 99.6 | 99.6 | 97.0 | 98.8 | 97.2 | 68.9 | 68.6 | 69.1 | 69.1 | 69.5 | 69.3 | 69.5 | 69.5 | 68.9 | 68.9 | 69.5 | 69.5 | 69.1 | 69.1 | 68.9 | 1  |
| 2                | 0.4  |      | 99.2 | 99.4 | 98.2 | 97.4 | 99.4 | 98.2 | 99.4  | 98.2 | 98.0 | 97.8 | 98.0  | 99.2 | 99.2 | 96.9 | 98.4 | 96.9 | 68.7 | 68.4 | 68.9 | 68.9 | 69.3 | 69.1 | 69.3 | 69.3 | 68.6 | 68.6 | 69.3 | 69.3 | 68.9 | 68.9 | 68.6 | 2  |
| 3                | 0.4  | 0.8  |      | 99.8 | 98.6 | 97.2 | 99.4 | 98.0 | 99.4  | 98.2 | 98.0 | 97.8 | 98.0  | 99.6 | 99.6 | 97.0 | 98.4 | 96.9 | 68.5 | 68.2 | 68.6 | 68.6 | 69.1 | 68.9 | 69.1 | 69.1 | 68.4 | 68.4 | 69.1 | 69.1 | 68.6 | 68.6 | 68.4 | 3  |
| 4                | 0.2  | 0.6  | 0.2  |      | 98.8 | 97.4 | 99.6 | 98.2 | 99.6  | 98.4 | 98.2 | 98.0 | 98.2  | 99.8 | 99.8 | 97.2 | 98.6 | 97.0 | 68.7 | 68.4 | 68.9 | 68.9 | 69.3 | 69.1 | 69.3 | 69.3 | 68.6 | 68.6 | 69.3 | 69.3 | 68.9 | 68.9 | 68.6 | 4  |
| 5                | 1.4  | 1.8  | 1.4  | 1.2  |      | 96.7 | 98.4 | 97.4 | 98.4  | 97.2 | 97.4 | 97.2 | 97.4  | 98.6 | 98.6 | 96.1 | 97.4 | 95.9 | 68.5 | 68.2 | 68.6 | 68.6 | 69.1 | 68.9 | 69.1 | 69.1 | 68.4 | 68.4 | 69.1 | 69.1 | 68.6 | 68.6 | 68.4 | 5  |
| 6                | 2.4  | 2.6  | 2.8  | 2.6  | 3.4  |      | 97.8 | 98.4 | 97.8  | 97.8 | 98.0 | 97.8 | 98.0  | 97.2 | 97.2 | 96.3 | 97.2 | 96.5 | 68.7 | 68.2 | 68.6 | 68.6 | 69.1 | 68.9 | 69.1 | 69.1 | 68.2 | 68.4 | 69.1 | 69.1 | 68.6 | 68.6 | 68.4 | 6  |
| 7                | 0.2  | 0.6  | 0.6  | 0.4  | 1.6  | 2.2  |      | 98.2 | 100.0 | 98.4 | 98.2 | 98.0 | 98.2  | 99.4 | 99.4 | 96.9 | 98.6 | 97.0 | 69.1 | 68.9 | 69.3 | 69.3 | 69.7 | 69.5 | 69.7 | 69.7 | 69.1 | 69.1 | 69.7 | 69.7 | 69.3 | 69.3 | 69.1 | 7  |
| 8                | 1.6  | 1.8  | 2.0  | 1.8  | 2.6  | 1.6  | 1.8  |      | 98.2  | 99.4 | 99.6 | 99.4 | 99.6  | 98.0 | 98.0 | 97.4 | 98.0 | 97.2 | 68.5 | 68.0 | 68.4 | 68.4 | 68.9 | 68.6 | 68.9 | 68.9 | 68.2 | 68.2 | 68.9 | 68.9 | 68.4 | 68.4 | 68.2 | 8  |
| 9                | 0.2  | 0.6  | 0.6  | 0.4  | 1.6  | 2.2  | 0.0  | 1.8  |       | 98.4 | 98.2 | 98.0 | 98.2  | 99.4 | 99.4 | 96.9 | 98.6 | 97.0 | 69.1 | 68.9 | 69.3 | 69.3 | 69.7 | 69.5 | 69.7 | 69.7 | 69.1 | 69.1 | 69.7 | 69.7 | 69.3 | 69.3 | 69.1 | 9  |
| 10               | 1.4  | 1.8  | 1.8  | 1.6  | 2.8  | 2.2  | 1.6  | 0.6  | 1.6   |      | 99.8 | 99.6 | 99.8  | 98.2 | 98.2 | 98.0 | 98.2 | 97.4 | 68.7 | 68.4 | 68.9 | 68.9 | 69.3 | 69.1 | 69.3 | 69.3 | 68.6 | 68.6 | 69.3 | 69.3 | 68.9 | 68.9 | 68.6 | 10 |
| 11               | 1.6  | 2.0  | 2.0  | 1.8  | 2.6  | 2.0  | 1.8  | 0.4  | 1.8   | 0.2  |      | 99.8 | 100.0 | 98.0 | 98.0 | 97.8 | 98.0 | 97.2 | 68.9 | 68.4 | 68.9 | 68.9 | 69.3 | 69.1 | 69.3 | 69.3 | 68.6 | 68.6 | 69.3 | 69.3 | 68.9 | 68.9 | 68.6 | 11 |
| 12               | 1.8  | 2.2  | 2.2  | 2.0  | 2.8  | 2.2  | 2.0  | 0.6  | 2.0   | 0.4  | 0.2  |      | 99.8  | 97.8 | 97.8 | 97.6 | 97.8 | 97.0 | 68.9 | 68.4 | 68.9 | 68.9 | 69.3 | 69.1 | 69.3 | 69.3 | 68.6 | 68.6 | 69.3 | 69.3 | 68.9 | 68.9 | 68.6 | 12 |
| 13               | 1.6  | 2.0  | 2.0  | 1.8  | 2.6  | 2.0  | 1.8  | 0.4  | 1.8   | 0.2  | 0.0  | 0.2  |       | 98.0 | 98.0 | 97.8 | 98.0 | 97.2 | 68.9 | 68.4 | 68.9 | 68.9 | 69.3 | 69.1 | 69.3 | 69.3 | 68.6 | 68.6 | 69.3 | 69.3 | 68.9 | 68.9 | 68.6 | 13 |
| 14               | 0.4  | 0.8  | 0.4  | 0.2  | 1.4  | 2.8  | 0.6  | 2.0  | 0.6   | 1.8  | 2.0  | 2.2  | 2.0   |      | 99.6 | 97.0 | 98.4 | 96.9 | 68.7 | 68.4 | 68.9 | 68.9 | 69.3 | 69.1 | 69.3 | 69.3 | 68.6 | 68.6 | 69.3 | 69.3 | 68.9 | 68.9 | 68.6 | 14 |
| 15               | 0.4  | 0.8  | 0.4  | 0.2  | 1.4  | 2.8  | 0.6  | 2.0  | 0.6   | 1.8  | 2.0  | 2.2  | 2.0   | 0.4  |      | 97.0 | 98.4 | 96.9 | 68.7 | 68.4 | 68.9 | 68.9 | 69.3 | 69.1 | 69.3 | 69.3 | 68.6 | 68.6 | 69.3 | 69.3 | 68.9 | 68.9 | 68.6 | 15 |
| 16               | 3.0  | 3.2  | 3.0  | 2.8  | 4.0  | 3.8  | 3.2  | 2.6  | 3.2   | 2.0  | 2.2  | 2.4  | 2.2   | 3.0  | 3.0  |      | 96.3 | 95.5 | 67.9 | 67.6 | 68.0 | 68.0 | 68.4 | 68.2 | 68.4 | 68.4 | 67.8 | 67.8 | 68.4 | 68.4 | 68.0 | 68.0 | 67.8 | 16 |
| 17               | 1.2  | 1.6  | 1.6  | 1.4  | 2.6  | 2.8  | 1.4  | 2.0  | 1.4   | 1.8  | 2.0  | 2.2  | 2.0   | 1.6  | 1.6  | 3.8  |      | 98.4 | 68.3 | 68.0 | 68.4 | 68.4 | 68.9 | 68.6 | 68.9 | 68.9 | 68.2 | 68.2 | 68.9 | 68.9 | 68.4 | 68.4 | 68.2 | 17 |
| 18               | 2.8  | 3.2  | 3.2  | 3.0  | 4.3  | 3.6  | 3.0  | 2.8  | 3.0   | 2.6  | 2.8  | 3.0  | 2.8   | 3.2  | 3.2  | 4.7  | 1.6  |      | 68.3 | 68.0 | 68.4 | 68.4 | 68.9 | 68.6 | 68.9 | 68.9 | 68.6 | 68.2 | 68.9 | 68.9 | 68.4 | 68.4 | 68.2 | 18 |
| 19               | 40.2 | 40.5 | 40.8 | 40.5 | 40.8 | 40.5 | 39.8 | 40.8 | 39.8  | 40.5 | 40.2 | 40.2 | 40.2  | 40.5 | 40.5 | 41.9 | 41.2 | 41.2 |      | 98.8 | 99.2 | 99.0 | 99.2 | 99.4 | 99.4 | 99.6 | 98.8 | 98.8 | 99.6 | 99.8 | 98.6 | 99.0 | 98.4 | 19 |
| 20               | 40.5 | 40.9 | 41.2 | 40.9 | 41.2 | 41.2 | 40.2 | 41.6 | 40.2  | 40.9 | 40.9 | 40.9 | 40.9  | 40.9 | 40.9 | 42.3 | 41.6 | 41.6 | 1.2  |      | 98.4 | 98.6 | 98.8 | 98.6 | 99.0 | 99.2 | 98.0 | 98.0 | 98.8 | 99.0 | 97.8 | 98.2 | 97.6 | 20 |
| 21               | 39.8 | 40.2 | 40.5 | 40.2 | 40.5 | 40.5 | 39.5 | 40.9 | 39.5  | 40.2 | 40.2 | 40.2 | 40.2  | 40.2 | 40.2 | 41.6 | 40.9 | 40.9 | 0.8  | 1.6  |      | 98.6 | 98.8 | 99.0 | 99.0 | 99.2 | 98.8 | 99.2 | 99.2 | 99.4 | 98.4 | 99.0 | 98.2 | 21 |
| 22               | 39.8 | 40.2 | 40.5 | 40.2 | 40.5 | 40.5 | 39.5 | 40.9 | 39.5  | 40.2 | 40.2 | 40.2 | 40.2  | 40.2 | 40.2 | 41.6 | 40.9 | 40.9 | 1.0  | 1.4  | 1.4  |      | 99.4 | 98.8 | 99.2 | 99.4 | 98.2 | 98.2 | 99.0 | 99.2 | 98.0 | 98.4 | 97.8 | 22 |
| 23               | 39.2 | 39.5 | 39.8 | 39.5 | 39.8 | 39.8 | 38.8 | 40.2 | 38.8  | 39.5 | 39.5 | 39.5 | 39.5  | 39.5 | 39.5 | 40.9 | 40.2 | 40.2 | 0.8  | 1.2  | 1.2  | 0.6  |      | 99.0 | 99.4 | 99.6 | 98.4 | 98.4 | 99.2 | 99.4 | 98.2 | 98.6 | 98.0 | 23 |
| 24               | 39.5 | 39.8 | 40.2 | 39.8 | 40.2 | 40.2 | 39.2 | 40.5 | 39.2  | 39.8 | 39.8 | 39.8 | 39.8  | 39.8 | 39.8 | 41.2 | 40.5 | 40.5 | 0.6  | 1.4  | 1.0  | 1.2  | 1.0  |      | 99.2 | 99.4 | 98.6 | 98.6 | 99.4 | 99.6 | 98.4 | 98.8 | 98.2 | 24 |
| 25               | 39.2 | 39.5 | 39.8 | 39.5 | 39.8 | 39.8 | 38.8 | 40.2 | 38.8  | 39.5 | 39.5 | 39.5 | 39.5  | 39.5 | 39.5 | 40.9 | 40.2 | 40.2 | 0.6  | 1.0  | 1.0  | 0.8  | 0.6  | 0.8  |      | 99.8 | 98.6 | 98.6 | 99.4 | 99.6 | 98.4 | 98.8 | 98.2 | 25 |
| 26               | 39.2 | 39.5 | 39.8 | 39.5 | 39.8 | 39.8 | 38.8 | 40.2 | 38.8  | 39.5 | 39.5 | 39.5 | 39.5  | 39.5 | 39.5 | 40.9 | 40.2 | 40.2 | 0.4  | 0.8  | 0.8  | 0.6  | 0.4  | 0.6  | 0.2  |      | 98.8 | 98.8 | 99.6 | 99.8 | 98.6 | 99.0 | 98.4 | 26 |
| 27               | 40.2 | 40.5 | 40.9 | 40.5 | 40.9 | 41.2 | 39.8 | 41.2 | 39.8  | 40.5 | 40.5 | 40.5 | 40.5  | 40.5 | 40.5 | 41.9 | 41.2 | 40.5 | 1.2  | 2.0  | 1.2  | 1.8  | 1.6  | 1.4  | 1.4  | 1.2  |      | 98.4 | 98.8 | 99.0 | 97.8 | 98.2 | 97.6 | 27 |
| 28               | 40.2 | 40.5 | 40.9 | 40.5 | 40.9 | 40.9 | 39.8 | 41.2 | 39.8  | 40.5 | 40.5 | 40.5 | 40.5  | 40.5 | 40.5 | 41.9 | 41.2 | 41.2 | 1.2  | 2.0  | 0.8  | 1.8  | 1.6  | 1.4  | 1.4  | 1.2  | 1.6  |      | 98.8 | 99.0 | 98.2 | 98.6 | 97.8 | 28 |
| 29               | 39.2 | 39.5 | 39.8 | 39.5 | 39.8 | 39.8 | 38.8 | 40.2 | 38.8  | 39.5 | 39.5 | 39.5 | 39.5  | 39.5 | 39.5 | 40.9 | 40.2 | 40.2 | 0.4  | 1.2  | 0.8  | 1.0  | 0.8  | 0.6  | 0.6  | 0.4  | 1.2  | 1.2  |      | 99.8 | 98.6 | 99.0 | 98.4 | 29 |
| 30               | 39.2 | 39.5 | 39.8 | 39.5 | 39.8 | 39.8 | 38.8 | 40.2 | 38.8  | 39.5 | 39.5 | 39.5 | 39.5  | 39.5 | 39.5 | 40.9 | 40.2 | 40.2 | 0.2  | 1.0  | 0.6  | 0.8  | 0.6  | 0.4  | 0.4  | 0.2  | 1.0  | 1.0  | 0.2  |      | 98.8 | 99.2 | 98.6 | 30 |
| 31               | 39.8 | 40.2 | 40.5 | 40.2 | 40.5 | 40.5 | 39.5 | 40.9 | 39.5  | 40.2 | 40.2 | 40.2 | 40.2  | 40.2 | 40.2 | 41.6 | 40.9 | 40.9 | 1.4  | 2.2  | 1.6  | 2.0  | 1.8  | 1.6  | 1.6  | 1.4  | 2.2  | 1.8  | 1.4  | 1.2  |      | 98.6 | 99.4 | 31 |
| 32               | 39.8 | 40.2 | 40.5 | 40.2 | 40.5 | 40.5 | 39.5 | 40.9 | 39.5  | 40.2 | 40.2 | 40.2 | 40.2  | 40.2 | 40.2 | 41.6 | 40.9 | 40.9 | 1.0  | 1.8  | 1.0  | 1.6  | 1.4  | 1.2  | 1.2  | 1.0  | 1.8  | 1.4  | 1.0  | 0.8  | 1.4  |      | 98.4 | 32 |
| 33               | 40.2 | 40.5 | 40.9 | 40.5 | 40.9 | 40.9 | 39.8 | 41.2 | 39.8  | 40.5 | 40.5 | 40.5 | 40.5  | 40.5 | 40.5 | 41.9 | 41.2 | 41.2 | 1.6  | 2.4  | 1.8  | 2.2  | 2.0  | 1.8  | 1.8  | 1.6  | 2.4  | 2.2  | 1.6  | 1.4  | 0.6  | 1.6  |      | 33 |
|                  | 1    | 2    | 3    | 4    | 5    | 6    | 7    | 8    | 9     | 10   | 11   | 12   | 13    | 14   | 15   | 16   | 17   | 18   | 19   | 20   | 21   | 22   | 23   | 24   | 25   | 26   | 27   | 28   | 29   | 30   | 31   | 32   | 33   |    |

Feline\_chaphamaparvovirus-MN396757.1-Ca  
Feline\_chaphamaparvovirus-MN794869.1-US  
Feline\_chaphamaparvovirus-MW404251.1-It  
Feline\_chaphamaparvovirus-MW404252.1-It  
Feline\_chaphamaparvovirus-MW404253.1-It  
Feline\_chaphamaparvovirus-MT708230.1-Ch  
Feline\_chaphamaparvovirus-MT708231.1-Ch  
Feline\_chaphamaparvovirus-MZ031965.1-Ch  
Feline\_chaphamaparvovirus-MZ031966.1-Ch  
Feline\_chaphamaparvovirus-OP499830.1-Ch  
Feline\_chaphamaparvovirus-OP499831.1-Ch  
Feline\_chaphamaparvovirus-OP499832.1-Ch  
Feline\_chaphamaparvovirus-OP499833.1-Ch  
Feline\_chaphamaparvovirus-MW404254.1-It  
Feline\_chaphamaparvovirus-MW404255.1-It  
Feline\_chaphamaparvovirus-MZ712100.1-Tu  
Feline\_chaphamaparvovirus-OQ162043.1-20  
Feline\_chaphamaparvovirus-OQ162042.1-20  
Carnivore\_chapparvovirus-MK448316.1-USA  
Carnivore\_chapparvovirus-MT123283.1-Chi  
Carnivore\_chapparvovirus-MT123284.1-Chi  
Carnivore\_chapparvovirus-MT123285.1-Chi  
Carnivore\_chapparvovirus-MT123286.1-Chi  
Carnivore\_chapparvovirus-MT123287.1-Chi  
Carnivore\_chapparvovirus-MT710947.1-Ita  
Carnivore\_chapparvovirus-MT710948.1-Ita  
Carnivore\_chapparvovirus-MN928790.1-Chi  
Carnivore\_chapparvovirus-MN928791.1-Chi  
Carnivore\_chapparvovirus-OK546100.1-Can  
Carnivore\_chapparvovirus-OK546101.1-Can  
Carnivore\_chapparvovirus-OK546102.1-Can  
Carnivore\_chapparvovirus-OM640108.1-Can  
Carnivore\_chapparvovirus-OM640109.1-Can
